# Supplementary material
Source: MDPI journal article supplement (https://www.mdpi.com/2071-1050/11/11/3017)
Supplement: s1 [file s1]

## Sheet: Description
Nutrient-dense Crops for Rural and Peri-urban Smallholders in Kenya – a Regional Social Accounting Approach
Henning Krause, Anja Faße, Ulrike Grote
This excel file shows the disaggregated social accounting matrix and multiplier analysis on which the paper is based on
Table S1 shows the disaggregated SAM
Table S2 shows the multiplier analysis
Accounts marked in grey are endogenous accounts
Fields marked in blue are relevant for the calculation of production linkage effects of the respective activities
Fields marked in orange are relevant for the calculation of income effects of the respective activities for the different household groups

## Sheet: S1 Social Accounting Matrix
			1	2	3	4	5	6	7	8	9	10	11	12	13	14	15	16	17	18	19	20	21	22	23	24	25	26	27	28	29	30	31	32	33	34	35	36	37	38	39	40	41	42	43	44	45	46	47
			Activities																												Commodities
			Banana	Beans	Coffee	Groundnuts	Maize	Sugarcane	Sweet potatoes	Napier grass	Tea	Cabbages	Irish potatoes	Spinach	Pumpkins	Kales/sukuma wiki	Other food crops	Amaranth	Cowpeas	African night shade	Spiderplant	Ethiopian kale	Mitoo	Other ind. veg	Livestock	Hunting, collecting, logging	Firewood + coal	Wage employment agr. sector	Wage emploment non-agr. sector	Own business activity	Banana	Beans	Coffee	Groundnuts	Maize	Sugarcane	Sweet potatoes	Napier grass	Tea	Cabbages	Irish potatoes	Spinach	Pumpkins	Kales/sukuma wiki	Other food crops	Amaranth	Cowpeas	African night shade	Spiderplant
1	Activities	Banana	0	0	0	0	0	0	0	0	0	0	0	0	0	0	0	0	0	0	0	0	0	0	0	0	0	0	0	0	108037	0	0	0	0	0	0	0	0	0	0	0	0	0	0	0	0	0	0
2		Beans	0	0	0	0	0	0	0	0	0	0	0	0	0	0	0	0	0	0	0	0	0	0	0	0	0	0	0	0	0	181980	0	0	0	0	0	0	0	0	0	0	0	0	0	0	0	0	0
3		Coffee	0	0	0	0	0	0	0	0	0	0	0	0	0	0	0	0	0	0	0	0	0	0	0	0	0	0	0	0	0	0	25960.6	0	0	0	0	0	0	0	0	0	0	0	0	0	0	0	0
4		Groundnuts	0	0	0	0	0	0	0	0	0	0	0	0	0	0	0	0	0	0	0	0	0	0	0	0	0	0	0	0	0	0	0	7849.54	0	0	0	0	0	0	0	0	0	0	0	0	0	0	0
5		Maize	0	0	0	0	0	0	0	0	0	0	0	0	0	0	0	0	0	0	0	0	0	0	0	0	0	0	0	0	0	0	0	0	189261	0	0	0	0	0	0	0	0	0	0	0	0	0	0
6		Sugarcane	0	0	0	0	0	0	0	0	0	0	0	0	0	0	0	0	0	0	0	0	0	0	0	0	0	0	0	0	0	0	0	0	0	177471	0	0	0	0	0	0	0	0	0	0	0	0	0
7		Sweet potatoes	0	0	0	0	0	0	0	0	0	0	0	0	0	0	0	0	0	0	0	0	0	0	0	0	0	0	0	0	0	0	0	0	0	0	30860.7	0	0	0	0	0	0	0	0	0	0	0	0
8		Napier grass	0	0	0	0	0	0	0	0	0	0	0	0	0	0	0	0	0	0	0	0	0	0	0	0	0	0	0	0	0	0	0	0	0	0	0	485931	0	0	0	0	0	0	0	0	0	0	0
9		Tea	0	0	0	0	0	0	0	0	0	0	0	0	0	0	0	0	0	0	0	0	0	0	0	0	0	0	0	0	0	0	0	0	0	0	0	0	30714.4	0	0	0	0	0	0	0	0	0	0
10		Cabbages	0	0	0	0	0	0	0	0	0	0	0	0	0	0	0	0	0	0	0	0	0	0	0	0	0	0	0	0	0	0	0	0	0	0	0	0	0	20727.6	0	0	0	0	0	0	0	0	0
11		Irish potatoes	0	0	0	0	0	0	0	0	0	0	0	0	0	0	0	0	0	0	0	0	0	0	0	0	0	0	0	0	0	0	0	0	0	0	0	0	0	0	15252.6	0	0	0	0	0	0	0	0
12		Spinach	0	0	0	0	0	0	0	0	0	0	0	0	0	0	0	0	0	0	0	0	0	0	0	0	0	0	0	0	0	0	0	0	0	0	0	0	0	0	0	77332	0	0	0	0	0	0	0
13		Pumpkins	0	0	0	0	0	0	0	0	0	0	0	0	0	0	0	0	0	0	0	0	0	0	0	0	0	0	0	0	0	0	0	0	0	0	0	0	0	0	0	0	2017.2	0	0	0	0	0	0
14		Kales/sukuma wiki	0	0	0	0	0	0	0	0	0	0	0	0	0	0	0	0	0	0	0	0	0	0	0	0	0	0	0	0	0	0	0	0	0	0	0	0	0	0	0	0	0	59636.5	0	0	0	0	0
15		Other food crops	0	0	0	0	0	0	0	0	0	0	0	0	0	0	0	0	0	0	0	0	0	0	0	0	0	0	0	0	0	0	0	0	0	0	0	0	0	0	0	0	0	0	495550	0	0	0	0
16		Amaranth	0	0	0	0	0	0	0	0	0	0	0	0	0	0	0	0	0	0	0	0	0	0	0	0	0	0	0	0	0	0	0	0	0	0	0	0	0	0	0	0	0	0	0	70320.4	0	0	0
17		Cowpeas	0	0	0	0	0	0	0	0	0	0	0	0	0	0	0	0	0	0	0	0	0	0	0	0	0	0	0	0	0	0	0	0	0	0	0	0	0	0	0	0	0	0	0	0	34833.7	0	0
18		African night shade	0	0	0	0	0	0	0	0	0	0	0	0	0	0	0	0	0	0	0	0	0	0	0	0	0	0	0	0	0	0	0	0	0	0	0	0	0	0	0	0	0	0	0	0	0	135914	0
19		Spiderplant	0	0	0	0	0	0	0	0	0	0	0	0	0	0	0	0	0	0	0	0	0	0	0	0	0	0	0	0	0	0	0	0	0	0	0	0	0	0	0	0	0	0	0	0	0	0	54220.4
20		Ethiopian kale	0	0	0	0	0	0	0	0	0	0	0	0	0	0	0	0	0	0	0	0	0	0	0	0	0	0	0	0	0	0	0	0	0	0	0	0	0	0	0	0	0	0	0	0	0	0	0
21		Mitoo	0	0	0	0	0	0	0	0	0	0	0	0	0	0	0	0	0	0	0	0	0	0	0	0	0	0	0	0	0	0	0	0	0	0	0	0	0	0	0	0	0	0	0	0	0	0	0
22		Other ind. veg	0	0	0	0	0	0	0	0	0	0	0	0	0	0	0	0	0	0	0	0	0	0	0	0	0	0	0	0	0	0	0	0	0	0	0	0	0	0	0	0	0	0	0	0	0	0	0
23		Livestock	0	0	0	0	0	0	0	0	0	0	0	0	0	0	0	0	0	0	0	0	0	0	0	0	0	0	0	0	0	0	0	0	0	0	0	0	0	0	0	0	0	0	0	0	0	0	0
24		Hunting, collecting, logging	0	0	0	0	0	0	0	0	0	0	0	0	0	0	0	0	0	0	0	0	0	0	0	0	0	0	0	0	0	0	0	0	0	0	0	0	0	0	0	0	0	0	0	0	0	0	0
25		Firewood + coal	0	0	0	0	0	0	0	0	0	0	0	0	0	0	0	0	0	0	0	0	0	0	0	0	0	0	0	0	0	0	0	0	0	0	0	0	0	0	0	0	0	0	0	0	0	0	0
26		Wage employment agr. sector	0	0	0	0	0	0	0	0	0	0	0	0	0	0	0	0	0	0	0	0	0	0	0	0	0	0	0	0	0	0	0	0	0	0	0	0	0	0	0	0	0	0	0	0	0	0	0
27		Wage emploment non-agr. sector	0	0	0	0	0	0	0	0	0	0	0	0	0	0	0	0	0	0	0	0	0	0	0	0	0	0	0	0	0	0	0	0	0	0	0	0	0	0	0	0	0	0	0	0	0	0	0
28		Own business activity	0	0	0	0	0	0	0	0	0	0	0	0	0	0	0	0	0	0	0	0	0	0	0	0	0	0	0	0	0	0	0	0	0	0	0	0	0	0	0	0	0	0	0	0	0	0	0
29	Commodities	Banana	0	0	0	0	0	0	0	0	0	0	0	0	0	0	0	0	0	0	0	0	0	0	0	0	0	0	0	0	0	0	0	0	0	0	0	0	0	0	0	0	0	0	0	0	0	0	0
30		Beans	0	0	0	0	0	0	0	0	0	0	0	0	0	0	0	0	0	0	0	0	0	0	0	0	0	0	0	0	0	0	0	0	0	0	0	0	0	0	0	0	0	0	0	0	0	0	0
31		Coffee	0	0	0	0	0	0	0	0	0	0	0	0	0	0	0	0	0	0	0	0	0	0	0	0	0	0	0	0	0	0	0	0	0	0	0	0	0	0	0	0	0	0	0	0	0	0	0
32		Groundnuts	0	0	0	0	0	0	0	0	0	0	0	0	0	0	0	0	0	0	0	0	0	0	0	0	0	0	0	0	0	0	0	0	0	0	0	0	0	0	0	0	0	0	0	0	0	0	0
33		Maize	0	0	0	0	0	0	0	0	0	0	0	0	0	0	0	0	0	0	0	0	0	0	0	0	0	0	0	0	0	0	0	0	0	0	0	0	0	0	0	0	0	0	0	0	0	0	0
34		Sugarcane	0	0	0	0	0	0	0	0	0	0	0	0	0	0	0	0	0	0	0	0	0	0	0	0	0	0	0	0	0	0	0	0	0	0	0	0	0	0	0	0	0	0	0	0	0	0	0
35		Sweet potatoes	0	0	0	0	0	0	0	0	0	0	0	0	0	0	0	0	0	0	0	0	0	0	0	0	0	0	0	0	0	0	0	0	0	0	0	0	0	0	0	0	0	0	0	0	0	0	0
36		Napier grass	0	0	0	0	0	0	0	0	0	0	0	0	0	0	0	0	0	0	0	0	0	0	477912	0	0	0	0	0	0	0	0	0	0	0	0	0	0	0	0	0	0	0	0	0	0	0	0
37		Tea	0	0	0	0	0	0	0	0	0	0	0	0	0	0	0	0	0	0	0	0	0	0	0	0	0	0	0	0	0	0	0	0	0	0	0	0	0	0	0	0	0	0	0	0	0	0	0
38		Cabbages	0	0	0	0	0	0	0	0	0	0	0	0	0	0	0	0	0	0	0	0	0	0	0	0	0	0	0	0	0	0	0	0	0	0	0	0	0	0	0	0	0	0	0	0	0	0	0
39		Irish potatoes	0	0	0	0	0	0	0	0	0	0	0	0	0	0	0	0	0	0	0	0	0	0	0	0	0	0	0	0	0	0	0	0	0	0	0	0	0	0	0	0	0	0	0	0	0	0	0
40		Spinach	0	0	0	0	0	0	0	0	0	0	0	0	0	0	0	0	0	0	0	0	0	0	0	0	0	0	0	0	0	0	0	0	0	0	0	0	0	0	0	0	0	0	0	0	0	0	0
41		Pumpkins	0	0	0	0	0	0	0	0	0	0	0	0	0	0	0	0	0	0	0	0	0	0	0	0	0	0	0	0	0	0	0	0	0	0	0	0	0	0	0	0	0	0	0	0	0	0	0
42		Kales/sukuma wiki	0	0	0	0	0	0	0	0	0	0	0	0	0	0	0	0	0	0	0	0	0	0	0	0	0	0	0	0	0	0	0	0	0	0	0	0	0	0	0	0	0	0	0	0	0	0	0
43		Other food crops	0	0	0	0	0	0	0	0	0	0	0	0	0	0	0	0	0	0	0	0	0	0	116	0	0	0	0	0	0	0	0	0	0	0	0	0	0	0	0	0	0	0	0	0	0	0	0
44		Amaranth	0	0	0	0	0	0	0	0	0	0	0	0	0	0	0	0	0	0	0	0	0	0	0	0	0	0	0	0	0	0	0	0	0	0	0	0	0	0	0	0	0	0	0	0	0	0	0
45		Cowpeas	0	0	0	0	0	0	0	0	0	0	0	0	0	0	0	0	0	0	0	0	0	0	0	0	0	0	0	0	0	0	0	0	0	0	0	0	0	0	0	0	0	0	0	0	0	0	0
46		African night shade	0	0	0	0	0	0	0	0	0	0	0	0	0	0	0	0	0	0	0	0	0	0	0	0	0	0	0	0	0	0	0	0	0	0	0	0	0	0	0	0	0	0	0	0	0	0	0
47		Spiderplant	0	0	0	0	0	0	0	0	0	0	0	0	0	0	0	0	0	0	0	0	0	0	0	0	0	0	0	0	0	0	0	0	0	0	0	0	0	0	0	0	0	0	0	0	0	0	0
48		Ethiopian Kale	0	0	0	0	0	0	0	0	0	0	0	0	0	0	0	0	0	0	0	0	0	0	0	0	0	0	0	0	0	0	0	0	0	0	0	0	0	0	0	0	0	0	0	0	0	0	0
49		Other ind. veg	0	0	0	0	0	0	0	0	0	0	0	0	0	0	0	0	0	0	0	0	0	0	0	0	0	0	0	0	0	0	0	0	0	0	0	0	0	0	0	0	0	0	0	0	0	0	0
50		Livestock (meat)	0	0	0	0	0	0	0	0	0	0	0	0	0	0	0	0	0	0	0	0	0	0	0	0	0	0	0	0	0	0	0	0	0	0	0	0	0	0	0	0	0	0	0	0	0	0	0
51		Livestock products (food)	0	0	0	0	0	0	0	0	0	0	0	0	0	0	0	0	0	0	0	0	0	0	0	0	0	0	0	0	0	0	0	0	0	0	0	0	0	0	0	0	0	0	0	0	0	0	0
52		Livestock products (dung)	10640.7	4046.76	1622.5	315.05	4458.96	314.819	646.268	16422.6	338.424	1772.71	2131.46	5548.72	886.842	10314.8	7863.81	9516.58	7306.22	14291.6	9233.3	1175.09	664.219	650.301	0	0	0	0	0	0	0	0	0	0	0	0	0	0	0	0	0	0	0	0	0	0	0	0	0
53		Firewood	0	0	0	0	0	0	0	0	0	0	0	0	0	0	0	0	0	0	0	0	0	0	0	0	0	0	0	0	0	0	0	0	0	0	0	0	0	0	0	0	0	0	0	0	0	0	0
54		Coal	0	0	0	0	0	0	0	0	0	0	0	0	0	0	0	0	0	0	0	0	0	0	0	0	0	0	0	0	0	0	0	0	0	0	0	0	0	0	0	0	0	0	0	0	0	0	0
55		Oil and gas	0	0	0	0	0	0	0	0	0	0	0	0	0	0	0	0	0	0	0	0	0	0	0	0	0	0	0	0	0	0	0	0	0	0	0	0	0	0	0	0	0	0	0	0	0	0	0
56		Processed food	0	0	0	0	0	0	0	0	0	0	0	0	0	0	0	0	0	0	0	0	0	0	0	0	0	0	0	0	0	0	0	0	0	0	0	0	0	0	0	0	0	0	0	0	0	0	0
57		Leisure goods	0	0	0	0	0	0	0	0	0	0	0	0	0	0	0	0	0	0	0	0	0	0	0	0	0	0	0	0	0	0	0	0	0	0	0	0	0	0	0	0	0	0	0	0	0	0	0
58		Necessities and utensils	0	0	0	0	0	0	0	0	0	0	0	0	0	0	0	0	0	0	0	0	0	0	0	0	0	0	0	0	0	0	0	0	0	0	0	0	0	0	0	0	0	0	0	0	0	0	0
59	Factors	peri-urban land (rented)	33.8677	2597.86	0	0	3917.49	0	0	381.888	0	51.5219	823.843	585.32	0	586.184	992.505	1078.22	582.32	1254.75	667.223	144.475	0	2.00523	0	0	0	0	0	0	0	0	0	0	0	0	0	0	0	0	0	0	0	0	0	0	0	0	0
60		peri-urban land (owned)	8141.41	79168.1	13400.7	0	115466	2178.7	941.564	38435.1	4171.42	5240.96	19729.6	22212	535.098	14944.6	29685.3	15702.1	9217.72	22421.4	18464.8	1950.06	200.827	420.07	0	0	0	0	0	0	0	0	0	0	0	0	0	0	0	0	0	0	0	0	0	0	0	0	0
61		rural land (rented)	45.3288	2040.46	0	481.889	2442.98	2092.54	71.4012	56.4462	261.91	45.1795	76.7669	11.2892	0.741023	410.124	2102.59	182.562	486.665	481.286	128.085	62.8435	478.802	0	0	0	0	0	0	0	0	0	0	0	0	0	0	0	0	0	0	0	0	0	0	0	0	0	0
62		rural land (owned)	10703.2	35534.2	1283.09	3452.91	68119.6	31026.7	4044.03	1223.82	12779.7	1274.61	995.466	53.1366	2306.16	5034.3	13632.6	7636.44	11843.1	13462	6457.86	1254.3	1298.03	1069.72	0	0	0	0	0	0	0	0	0	0	0	0	0	0	0	0	0	0	0	0	0	0	0	0	0
63		family labour	6588.41	21031.1	3545.91	2097.4	36415.7	4165.62	3217.53	3629.04	1626.74	1885.7	5442.86	7788.7	2873.92	12497.5	14822	11539.5	8848.32	16112.2	7907.92	1847.43	870.362	911.869	708218	2704.54	22381.3	54328.3	1.25421e+06	29567.6	0	0	0	0	0	0	0	0	0	0	0	0	0	0	0	0	0	0	0
64		hired labour	2301.86	20126.5	2357.62	2630.41	34727	9964.36	772.077	4865.05	5339.38	967.144	2276.33	3811.84	481.181	3572.37	8817.19	2553.55	2127.63	4957.72	2999.82	757.222	307.067	277.63	51245.7	0	0	0	0	0	0	0	0	0	0	0	0	0	0	0	0	0	0	0	0	0	0	0	0
65		Seeds	66.7841	21868.9	0	5384.64	29072.7	3062.38	0	37.9335	0.113463	1858.52	3142.07	3265.43	13.2436	9341.24	2940.94	5191.71	6286.05	11504.8	9731.76	2423.06	783.082	80.9747	0	0	0	0	0	0	0	0	0	0	0	0	0	0	0	0	0	0	0	0	0	0	0	0	0
66		Fertilizer (bought)	1160.01	12121.7	631.294	580.944	23740.7	3726.24	63.2198	562.43	4383.92	266.075	956.086	1305.57	202.009	1714.44	4372.83	1377.6	741.872	2234.95	1339.93	211.735	79.5553	64.3487	0	0	0	0	0	0	0	0	0	0	0	0	0	0	0	0	0	0	0	0	0	0	0	0	0
67		Pesticides	13.7613	738.542	2.25785	3.38677	703.546	161.436	4.5157	9.03139	15.8049	196.207	544.593	667.872	27.0942	1284.89	1460.49	625.564	561.429	1420.89	712.682	127.464	43.6894	67.6226	0	0	0	0	0	0	0	0	0	0	0	0	0	0	0	0	0	0	0	0	0	0	0	0	0
68		Machinery	147.977	5574.04	528.299	356.74	11306.2	2941.98	345.473	273.256	13.5471	0.112892	278.288	126.617	79.0603	307.669	2537.6	182.092	308.456	342.861	166.347	67.7384	44.0281	18.4259	0	0	0	0	0	0	0	0	0	0	0	0	0	0	0	0	0	0	0	0	0	0	0	0	0
69		Irrigation water	88.4325	11.2892	22.5785	0	69.9933	0	0	63.2198	0	167.457	144.051	1523.3	106.119	1434.75	1340.79	1466.62	167.532	1598.03	1332.96	204.712	2.03206	4.06413	0	0	0	0	0	0	0	0	0	0	0	0	0	0	0	0	0	0	0	0	0	0	0	0	0
70		Livestock feed/vetinary/other costs	0	0	0	0	0	0	0	0	0	0	0	0	0	0	0	0	0	0	0	0	0	0	574428	0	0	0	0	0	0	0	0	0	0	0	0	0	0	0	0	0	0	0	0	0	0	0	0
71		Agricultural profit	263573	148846	4511.52	-646.558	124629	174379	53935.4	419971	2949.8	10844.7	-10905.6	47559.8	560.257	26953.3	555561	57502.5	18927.2	124202	24441.8	7959.57	2969	34309.4	850983	28458.8	247231	0	0	0	0	0	0	0	0	0	0	0	0	0	0	0	0	0	0	0	0	0	0
72		Credits/capital	0	0	0	0	0	0	0	0	0	0	0	0	0	0	0	0	0	0	0	0	0	0	0	0	0	0	0	0	0	0	0	0	0	0	0	0	0	0	0	0	0	0	0	0	0	0	0
73	Households	Food-insecure rural households	0	0	0	0	0	0	0	0	0	0	0	0	0	0	0	0	0	0	0	0	0	0	0	0	0	0	0	0	0	0	0	0	0	0	0	0	0	0	0	0	0	0	0	0	0	0	0
74		Food-secure rural households	0	0	0	0	0	0	0	0	0	0	0	0	0	0	0	0	0	0	0	0	0	0	0	0	0	0	0	0	0	0	0	0	0	0	0	0	0	0	0	0	0	0	0	0	0	0	0
75		Food-insecure peri-urban households	0	0	0	0	0	0	0	0	0	0	0	0	0	0	0	0	0	0	0	0	0	0	0	0	0	0	0	0	0	0	0	0	0	0	0	0	0	0	0	0	0	0	0	0	0	0	0
76		Food-secure peri-urban households	0	0	0	0	0	0	0	0	0	0	0	0	0	0	0	0	0	0	0	0	0	0	0	0	0	0	0	0	0	0	0	0	0	0	0	0	0	0	0	0	0	0	0	0	0	0	0
77	Institutions	Government/health/school/church	0	0	0	0	0	0	0	0	0	0	0	0	0	0	0	0	0	0	0	0	0	0	0	0	0	0	0	0	0	0	0	0	0	0	0	0	0	0	0	0	0	0	0	0	0	0	0
78	Rest of village	Rest of village	0	0	0	0	0	0	0	0	0	0	0	0	0	0	0	0	0	0	0	0	0	0	0	0	0	0	0	0	0	0	0	4313.56	0	0	0	0.03	33845.7	0	27888.5	0	2874.17	0	1.06573e+06	0	0	0	0
79	Rest of world	Rest of world	0	0	0	0	0	0	0	0	0	0	0	0	0	0	0	0	0	0	0	0	0	0	0	0	0	0	0	0	0	0	0	0	0	0	0	0	0	0	0	0	0	0	0	0	0	0	0
80	TOTAL		303504	353705	27905.8	14656.8	455070	234014	64041.4	485931	31880.7	24570.9	25635.8	94459.6	8071.72	88396.2	646130	114555	67404.6	214284	83584.4	18185.7	7740.7	37876.4	2.6629e+06	31163.4	269613	54328.3	1.25421e+06	29567.6	108037	181980	25960.6	12163.1	189261	177471	30860.7	485931	64560	20727.6	43141.1	77332	4891.36	59636.5	1.56128e+06	70320.4	34833.7	135914	54220.4
[truncated: 33 more columns]

## Sheet: S2 Multiplier Analysis
			1	2	3	4	5	6	7	8	9	10	11	12	13	14	15	16	17	18	19	20	21	22	23	24	25	26	27	28	29	30	31	32	33	34	35	36	37	38	39	40	41	42	43	44	45	46	47
			Activities																												Commodities
			Banana	Beans	Coffee	Groundnuts	Maize	Sugarcane	Sweet potatoes	Napier grass	Tea	Cabbages	Irish potatoes	Spinach	Pumpkins	Kales/sukuma wiki	Other food crops	Amaranth	Cowpeas	African night shade	Spiderplant	Ethiopian kale	Mitoo	Other ind. veg	Livestock	Hunting, collecting, logging	Firewood + coal	Wage employment agr. sector	Wage emploment non-agr. sector	Own business activity	Banana	Beans	Coffee	Groundnuts	Maize	Sugarcane	Sweet potatoes	Napier grass	Tea	Cabbages	Irish potatoes	Spinach	Pumpkins	Kales/sukuma wiki	Other food crops	Amaranth	Cowpeas	African night shade	Spiderplant
1	Activities	Banana	0	0	0	0	0	0	0	0	0	0	0	0	0	0	0	0	0	0	0	0	0	0	0	0	0	0	0	0	108037	0	0	0	0	0	0	0	0	0	0	0	0	0	0	0	0	0	0
2		Beans	0	0	0	0	0	0	0	0	0	0	0	0	0	0	0	0	0	0	0	0	0	0	0	0	0	0	0	0	0	181980	0	0	0	0	0	0	0	0	0	0	0	0	0	0	0	0	0
3		Coffee	0	0	0	0	0	0	0	0	0	0	0	0	0	0	0	0	0	0	0	0	0	0	0	0	0	0	0	0	0	0	25960.6	0	0	0	0	0	0	0	0	0	0	0	0	0	0	0	0
4		Groundnuts	0	0	0	0	0	0	0	0	0	0	0	0	0	0	0	0	0	0	0	0	0	0	0	0	0	0	0	0	0	0	0	7849.54	0	0	0	0	0	0	0	0	0	0	0	0	0	0	0
5		Maize	0	0	0	0	0	0	0	0	0	0	0	0	0	0	0	0	0	0	0	0	0	0	0	0	0	0	0	0	0	0	0	0	189261	0	0	0	0	0	0	0	0	0	0	0	0	0	0
6		Sugarcane	0	0	0	0	0	0	0	0	0	0	0	0	0	0	0	0	0	0	0	0	0	0	0	0	0	0	0	0	0	0	0	0	0	177471	0	0	0	0	0	0	0	0	0	0	0	0	0
7		Sweet potatoes	0	0	0	0	0	0	0	0	0	0	0	0	0	0	0	0	0	0	0	0	0	0	0	0	0	0	0	0	0	0	0	0	0	0	30860.7	0	0	0	0	0	0	0	0	0	0	0	0
8		Napier grass	0	0	0	0	0	0	0	0	0	0	0	0	0	0	0	0	0	0	0	0	0	0	0	0	0	0	0	0	0	0	0	0	0	0	0	485931	0	0	0	0	0	0	0	0	0	0	0
9		Tea	0	0	0	0	0	0	0	0	0	0	0	0	0	0	0	0	0	0	0	0	0	0	0	0	0	0	0	0	0	0	0	0	0	0	0	0	30714.4	0	0	0	0	0	0	0	0	0	0
10		Cabbages	0	0	0	0	0	0	0	0	0	0	0	0	0	0	0	0	0	0	0	0	0	0	0	0	0	0	0	0	0	0	0	0	0	0	0	0	0	20727.6	0	0	0	0	0	0	0	0	0
11		Irish potatoes	0	0	0	0	0	0	0	0	0	0	0	0	0	0	0	0	0	0	0	0	0	0	0	0	0	0	0	0	0	0	0	0	0	0	0	0	0	0	15252.6	0	0	0	0	0	0	0	0
12		Spinach	0	0	0	0	0	0	0	0	0	0	0	0	0	0	0	0	0	0	0	0	0	0	0	0	0	0	0	0	0	0	0	0	0	0	0	0	0	0	0	77332	0	0	0	0	0	0	0
13		Pumpkins	0	0	0	0	0	0	0	0	0	0	0	0	0	0	0	0	0	0	0	0	0	0	0	0	0	0	0	0	0	0	0	0	0	0	0	0	0	0	0	0	2017.2	0	0	0	0	0	0
14		Kales/sukuma wiki	0	0	0	0	0	0	0	0	0	0	0	0	0	0	0	0	0	0	0	0	0	0	0	0	0	0	0	0	0	0	0	0	0	0	0	0	0	0	0	0	0	59636.5	0	0	0	0	0
15		Other food crops	0	0	0	0	0	0	0	0	0	0	0	0	0	0	0	0	0	0	0	0	0	0	0	0	0	0	0	0	0	0	0	0	0	0	0	0	0	0	0	0	0	0	495550	0	0	0	0
16		Amaranth	0	0	0	0	0	0	0	0	0	0	0	0	0	0	0	0	0	0	0	0	0	0	0	0	0	0	0	0	0	0	0	0	0	0	0	0	0	0	0	0	0	0	0	70320.4	0	0	0
17		Cowpeas	0	0	0	0	0	0	0	0	0	0	0	0	0	0	0	0	0	0	0	0	0	0	0	0	0	0	0	0	0	0	0	0	0	0	0	0	0	0	0	0	0	0	0	0	34833.7	0	0
18		African night shade	0	0	0	0	0	0	0	0	0	0	0	0	0	0	0	0	0	0	0	0	0	0	0	0	0	0	0	0	0	0	0	0	0	0	0	0	0	0	0	0	0	0	0	0	0	135914	0
19		Spiderplant	0	0	0	0	0	0	0	0	0	0	0	0	0	0	0	0	0	0	0	0	0	0	0	0	0	0	0	0	0	0	0	0	0	0	0	0	0	0	0	0	0	0	0	0	0	0	54220.4
20		Ethiopian kale	0	0	0	0	0	0	0	0	0	0	0	0	0	0	0	0	0	0	0	0	0	0	0	0	0	0	0	0	0	0	0	0	0	0	0	0	0	0	0	0	0	0	0	0	0	0	0
21		Mitoo	0	0	0	0	0	0	0	0	0	0	0	0	0	0	0	0	0	0	0	0	0	0	0	0	0	0	0	0	0	0	0	0	0	0	0	0	0	0	0	0	0	0	0	0	0	0	0
22		Other ind. veg	0	0	0	0	0	0	0	0	0	0	0	0	0	0	0	0	0	0	0	0	0	0	0	0	0	0	0	0	0	0	0	0	0	0	0	0	0	0	0	0	0	0	0	0	0	0	0
23		Livestock	0	0	0	0	0	0	0	0	0	0	0	0	0	0	0	0	0	0	0	0	0	0	0	0	0	0	0	0	0	0	0	0	0	0	0	0	0	0	0	0	0	0	0	0	0	0	0
24		Hunting, collecting, logging	0	0	0	0	0	0	0	0	0	0	0	0	0	0	0	0	0	0	0	0	0	0	0	0	0	0	0	0	0	0	0	0	0	0	0	0	0	0	0	0	0	0	0	0	0	0	0
25		Firewood + coal	0	0	0	0	0	0	0	0	0	0	0	0	0	0	0	0	0	0	0	0	0	0	0	0	0	0	0	0	0	0	0	0	0	0	0	0	0	0	0	0	0	0	0	0	0	0	0
26		Wage employment agr. sector	0	0	0	0	0	0	0	0	0	0	0	0	0	0	0	0	0	0	0	0	0	0	0	0	0	0	0	0	0	0	0	0	0	0	0	0	0	0	0	0	0	0	0	0	0	0	0
27		Wage emploment non-agr. sector	0	0	0	0	0	0	0	0	0	0	0	0	0	0	0	0	0	0	0	0	0	0	0	0	0	0	0	0	0	0	0	0	0	0	0	0	0	0	0	0	0	0	0	0	0	0	0
28		Own business activity	0	0	0	0	0	0	0	0	0	0	0	0	0	0	0	0	0	0	0	0	0	0	0	0	0	0	0	0	0	0	0	0	0	0	0	0	0	0	0	0	0	0	0	0	0	0	0
29	Commodities	Banana	0	0	0	0	0	0	0	0	0	0	0	0	0	0	0	0	0	0	0	0	0	0	0	0	0	0	0	0	0	0	0	0	0	0	0	0	0	0	0	0	0	0	0	0	0	0	0
30		Beans	0	0	0	0	0	0	0	0	0	0	0	0	0	0	0	0	0	0	0	0	0	0	0	0	0	0	0	0	0	0	0	0	0	0	0	0	0	0	0	0	0	0	0	0	0	0	0
31		Coffee	0	0	0	0	0	0	0	0	0	0	0	0	0	0	0	0	0	0	0	0	0	0	0	0	0	0	0	0	0	0	0	0	0	0	0	0	0	0	0	0	0	0	0	0	0	0	0
32		Groundnuts	0	0	0	0	0	0	0	0	0	0	0	0	0	0	0	0	0	0	0	0	0	0	0	0	0	0	0	0	0	0	0	0	0	0	0	0	0	0	0	0	0	0	0	0	0	0	0
33		Maize	0	0	0	0	0	0	0	0	0	0	0	0	0	0	0	0	0	0	0	0	0	0	0	0	0	0	0	0	0	0	0	0	0	0	0	0	0	0	0	0	0	0	0	0	0	0	0
34		Sugarcane	0	0	0	0	0	0	0	0	0	0	0	0	0	0	0	0	0	0	0	0	0	0	0	0	0	0	0	0	0	0	0	0	0	0	0	0	0	0	0	0	0	0	0	0	0	0	0
35		Sweet potatoes	0	0	0	0	0	0	0	0	0	0	0	0	0	0	0	0	0	0	0	0	0	0	0	0	0	0	0	0	0	0	0	0	0	0	0	0	0	0	0	0	0	0	0	0	0	0	0
36		Napier grass	0	0	0	0	0	0	0	0	0	0	0	0	0	0	0	0	0	0	0	0	0	0	477912	0	0	0	0	0	0	0	0	0	0	0	0	0	0	0	0	0	0	0	0	0	0	0	0
37		Tea	0	0	0	0	0	0	0	0	0	0	0	0	0	0	0	0	0	0	0	0	0	0	0	0	0	0	0	0	0	0	0	0	0	0	0	0	0	0	0	0	0	0	0	0	0	0	0
38		Cabbages	0	0	0	0	0	0	0	0	0	0	0	0	0	0	0	0	0	0	0	0	0	0	0	0	0	0	0	0	0	0	0	0	0	0	0	0	0	0	0	0	0	0	0	0	0	0	0
39		Irish potatoes	0	0	0	0	0	0	0	0	0	0	0	0	0	0	0	0	0	0	0	0	0	0	0	0	0	0	0	0	0	0	0	0	0	0	0	0	0	0	0	0	0	0	0	0	0	0	0
40		Spinach	0	0	0	0	0	0	0	0	0	0	0	0	0	0	0	0	0	0	0	0	0	0	0	0	0	0	0	0	0	0	0	0	0	0	0	0	0	0	0	0	0	0	0	0	0	0	0
41		Pumpkins	0	0	0	0	0	0	0	0	0	0	0	0	0	0	0	0	0	0	0	0	0	0	0	0	0	0	0	0	0	0	0	0	0	0	0	0	0	0	0	0	0	0	0	0	0	0	0
42		Kales/sukuma wiki	0	0	0	0	0	0	0	0	0	0	0	0	0	0	0	0	0	0	0	0	0	0	0	0	0	0	0	0	0	0	0	0	0	0	0	0	0	0	0	0	0	0	0	0	0	0	0
43		Other food crops	0	0	0	0	0	0	0	0	0	0	0	0	0	0	0	0	0	0	0	0	0	0	116	0	0	0	0	0	0	0	0	0	0	0	0	0	0	0	0	0	0	0	0	0	0	0	0
44		Amaranth	0	0	0	0	0	0	0	0	0	0	0	0	0	0	0	0	0	0	0	0	0	0	0	0	0	0	0	0	0	0	0	0	0	0	0	0	0	0	0	0	0	0	0	0	0	0	0
45		Cowpeas	0	0	0	0	0	0	0	0	0	0	0	0	0	0	0	0	0	0	0	0	0	0	0	0	0	0	0	0	0	0	0	0	0	0	0	0	0	0	0	0	0	0	0	0	0	0	0
46		African night shade	0	0	0	0	0	0	0	0	0	0	0	0	0	0	0	0	0	0	0	0	0	0	0	0	0	0	0	0	0	0	0	0	0	0	0	0	0	0	0	0	0	0	0	0	0	0	0
47		Spiderplant	0	0	0	0	0	0	0	0	0	0	0	0	0	0	0	0	0	0	0	0	0	0	0	0	0	0	0	0	0	0	0	0	0	0	0	0	0	0	0	0	0	0	0	0	0	0	0
48		Ethiopian Kale	0	0	0	0	0	0	0	0	0	0	0	0	0	0	0	0	0	0	0	0	0	0	0	0	0	0	0	0	0	0	0	0	0	0	0	0	0	0	0	0	0	0	0	0	0	0	0
49		Other ind. veg	0	0	0	0	0	0	0	0	0	0	0	0	0	0	0	0	0	0	0	0	0	0	0	0	0	0	0	0	0	0	0	0	0	0	0	0	0	0	0	0	0	0	0	0	0	0	0
50		Livestock (meat)	0	0	0	0	0	0	0	0	0	0	0	0	0	0	0	0	0	0	0	0	0	0	0	0	0	0	0	0	0	0	0	0	0	0	0	0	0	0	0	0	0	0	0	0	0	0	0
51		Livestock products (food)	0	0	0	0	0	0	0	0	0	0	0	0	0	0	0	0	0	0	0	0	0	0	0	0	0	0	0	0	0	0	0	0	0	0	0	0	0	0	0	0	0	0	0	0	0	0	0
52		Livestock products (dung)	10640.7	4046.76	1622.5	315.05	4458.96	314.819	646.268	16422.6	338.424	1772.71	2131.46	5548.72	886.842	10314.8	7863.81	9516.58	7306.22	14291.6	9233.3	1175.09	664.219	650.301	0	0	0	0	0	0	0	0	0	0	0	0	0	0	0	0	0	0	0	0	0	0	0	0	0
53		Firewood	0	0	0	0	0	0	0	0	0	0	0	0	0	0	0	0	0	0	0	0	0	0	0	0	0	0	0	0	0	0	0	0	0	0	0	0	0	0	0	0	0	0	0	0	0	0	0
54		Coal	0	0	0	0	0	0	0	0	0	0	0	0	0	0	0	0	0	0	0	0	0	0	0	0	0	0	0	0	0	0	0	0	0	0	0	0	0	0	0	0	0	0	0	0	0	0	0
55		Oil and gas	0	0	0	0	0	0	0	0	0	0	0	0	0	0	0	0	0	0	0	0	0	0	0	0	0	0	0	0	0	0	0	0	0	0	0	0	0	0	0	0	0	0	0	0	0	0	0
56		Processed food	0	0	0	0	0	0	0	0	0	0	0	0	0	0	0	0	0	0	0	0	0	0	0	0	0	0	0	0	0	0	0	0	0	0	0	0	0	0	0	0	0	0	0	0	0	0	0
57		Leisure goods	0	0	0	0	0	0	0	0	0	0	0	0	0	0	0	0	0	0	0	0	0	0	0	0	0	0	0	0	0	0	0	0	0	0	0	0	0	0	0	0	0	0	0	0	0	0	0
58		Necessities and utensils	0	0	0	0	0	0	0	0	0	0	0	0	0	0	0	0	0	0	0	0	0	0	0	0	0	0	0	0	0	0	0	0	0	0	0	0	0	0	0	0	0	0	0	0	0	0	0
59	Factors	peri-urban land (rented)	33.8677	2597.86	0	0	3917.49	0	0	381.888	0	51.5219	823.843	585.32	0	586.184	992.505	1078.22	582.32	1254.75	667.223	144.475	0	2.00523	0	0	0	0	0	0	0	0	0	0	0	0	0	0	0	0	0	0	0	0	0	0	0	0	0
60		peri-urban land (owned)	8141.41	79168.1	13400.7	0	115466	2178.7	941.564	38435.1	4171.42	5240.96	19729.6	22212	535.098	14944.6	29685.3	15702.1	9217.72	22421.4	18464.8	1950.06	200.827	420.07	0	0	0	0	0	0	0	0	0	0	0	0	0	0	0	0	0	0	0	0	0	0	0	0	0
61		rural land (rented)	45.3288	2040.46	0	481.889	2442.98	2092.54	71.4012	56.4462	261.91	45.1795	76.7669	11.2892	0.741023	410.124	2102.59	182.562	486.665	481.286	128.085	62.8435	478.802	0	0	0	0	0	0	0	0	0	0	0	0	0	0	0	0	0	0	0	0	0	0	0	0	0	0
62		rural land (owned)	10703.2	35534.2	1283.09	3452.91	68119.6	31026.7	4044.03	1223.82	12779.7	1274.61	995.466	53.1366	2306.16	5034.3	13632.6	7636.44	11843.1	13462	6457.86	1254.3	1298.03	1069.72	0	0	0	0	0	0	0	0	0	0	0	0	0	0	0	0	0	0	0	0	0	0	0	0	0
63		family labour	6588.41	21031.1	3545.91	2097.4	36415.7	4165.62	3217.53	3629.04	1626.74	1885.7	5442.86	7788.7	2873.92	12497.5	14822	11539.5	8848.32	16112.2	7907.92	1847.43	870.362	911.869	708218	2704.54	22381.3	54328.3	1.25421e+06	29567.6	0	0	0	0	0	0	0	0	0	0	0	0	0	0	0	0	0	0	0
64		hired labour	2301.86	20126.5	2357.62	2630.41	34727	9964.36	772.077	4865.05	5339.38	967.144	2276.33	3811.84	481.181	3572.37	8817.19	2553.55	2127.63	4957.72	2999.82	757.222	307.067	277.63	51245.7	0	0	0	0	0	0	0	0	0	0	0	0	0	0	0	0	0	0	0	0	0	0	0	0
65		Seeds	66.7841	21868.9	0	5384.64	29072.7	3062.38	0	37.9335	0.113463	1858.52	3142.07	3265.43	13.2436	9341.24	2940.94	5191.71	6286.05	11504.8	9731.76	2423.06	783.082	80.9747	0	0	0	0	0	0	0	0	0	0	0	0	0	0	0	0	0	0	0	0	0	0	0	0	0
66		Fertilizer (bought)	1160.01	12121.7	631.294	580.944	23740.7	3726.24	63.2198	562.43	4383.92	266.075	956.086	1305.57	202.009	1714.44	4372.83	1377.6	741.872	2234.95	1339.93	211.735	79.5553	64.3487	0	0	0	0	0	0	0	0	0	0	0	0	0	0	0	0	0	0	0	0	0	0	0	0	0
67		Pesticides	13.7613	738.542	2.25785	3.38677	703.546	161.436	4.5157	9.03139	15.8049	196.207	544.593	667.872	27.0942	1284.89	1460.49	625.564	561.429	1420.89	712.682	127.464	43.6894	67.6226	0	0	0	0	0	0	0	0	0	0	0	0	0	0	0	0	0	0	0	0	0	0	0	0	0
68		Machinery	147.977	5574.04	528.299	356.74	11306.2	2941.98	345.473	273.256	13.5471	0.112892	278.288	126.617	79.0603	307.669	2537.6	182.092	308.456	342.861	166.347	67.7384	44.0281	18.4259	0	0	0	0	0	0	0	0	0	0	0	0	0	0	0	0	0	0	0	0	0	0	0	0	0
69		Irrigation water	88.4325	11.2892	22.5785	0	69.9933	0	0	63.2198	0	167.457	144.051	1523.3	106.119	1434.75	1340.79	1466.62	167.532	1598.03	1332.96	204.712	2.03206	4.06413	0	0	0	0	0	0	0	0	0	0	0	0	0	0	0	0	0	0	0	0	0	0	0	0	0
70		Livestock feed/vetinary/other costs	0	0	0	0	0	0	0	0	0	0	0	0	0	0	0	0	0	0	0	0	0	0	574428	0	0	0	0	0	0	0	0	0	0	0	0	0	0	0	0	0	0	0	0	0	0	0	0
71		Agricultural profit	263573	148846	4511.52	-646.558	124629	174379	53935.4	419971	2949.8	10844.7	-10905.6	47559.8	560.257	26953.3	555561	57502.5	18927.2	124202	24441.8	7959.57	2969	34309.4	850983	28458.8	247231	0	0	0	0	0	0	0	0	0	0	0	0	0	0	0	0	0	0	0	0	0	0
72		Credits/capital	0	0	0	0	0	0	0	0	0	0	0	0	0	0	0	0	0	0	0	0	0	0	0	0	0	0	0	0	0	0	0	0	0	0	0	0	0	0	0	0	0	0	0	0	0	0	0
73	Households	Food-insecure rural households	0	0	0	0	0	0	0	0	0	0	0	0	0	0	0	0	0	0	0	0	0	0	0	0	0	0	0	0	0	0	0	0	0	0	0	0	0	0	0	0	0	0	0	0	0	0	0
74		Food-secure rural households	0	0	0	0	0	0	0	0	0	0	0	0	0	0	0	0	0	0	0	0	0	0	0	0	0	0	0	0	0	0	0	0	0	0	0	0	0	0	0	0	0	0	0	0	0	0	0
75		Food-insecure peri-urban households	0	0	0	0	0	0	0	0	0	0	0	0	0	0	0	0	0	0	0	0	0	0	0	0	0	0	0	0	0	0	0	0	0	0	0	0	0	0	0	0	0	0	0	0	0	0	0
76		Food-secure peri-urban households	0	0	0	0	0	0	0	0	0	0	0	0	0	0	0	0	0	0	0	0	0	0	0	0	0	0	0	0	0	0	0	0	0	0	0	0	0	0	0	0	0	0	0	0	0	0	0
77	Institutions	Government/health/school/church	0	0	0	0	0	0	0	0	0	0	0	0	0	0	0	0	0	0	0	0	0	0	0	0	0	0	0	0	0	0	0	0	0	0	0	0	0	0	0	0	0	0	0	0	0	0	0
78	Rest of village	Rest of village	0	0	0	0	0	0	0	0	0	0	0	0	0	0	0	0	0	0	0	0	0	0	0	0	0	0	0	0	0	0	0	4313.56	0	0	0	0.03	33845.7	0	27888.5	0	2874.17	0	1.06573e+06	0	0	0	0
79	Rest of world	Rest of world	0	0	0	0	0	0	0	0	0	0	0	0	0	0	0	0	0	0	0	0	0	0	0	0	0	0	0	0	0	0	0	0	0	0	0	0	0	0	0	0	0	0	0	0	0	0	0
80	TOTAL		303504	353705	27905.8	14656.8	455070	234014	64041.4	485931	31880.7	24570.9	25635.8	94459.6	8071.72	88396.2	646130	114555	67404.6	214284	83584.4	18185.7	7740.7	37876.4	2.6629e+06	31163.4	269613	54328.3	1.25421e+06	29567.6	108037	181980	25960.6	12163.1	189261	177471	30860.7	485931	64560	20727.6	43141.1	77332	4891.36	59636.5	1.56128e+06	70320.4	34833.7	135914	54220.4
			1	2	3	4	5	6	7	8	9	10	11	12	13	14	15	16	17	18	19	20	21	22	23	24	25	26	27	28	29	30	31	32	33	34	35	36	37	38	39	40	41	42	43	44	45	46	47
			Activities																												Commodities
		MI	Banana	Beans	Coffee	Groundnuts	Maize	Sugarcane	Sweet potatoes	Napier grass	Tea	Cabbages	Irish potatoes	Spinach	Pumpkins	Kales/sukuma wiki	Other food crops	Amaranth	Cowpeas	African night shade	Spiderplant	Ethiopian kale	Mitoo	Other ind. veg	Livestock	Hunting, collecting, logging	Firewood + coal	Wage employment agr. sector	Wage emploment non-agr. sector	Own business activity	Banana	Beans	Coffee	Groundnuts	Maize	Sugarcane	Sweet potatoes	Napier grass	Tea	Cabbages	Irish potatoes	Spinach	Pumpkins	Kales/sukuma wiki	Other food crops	Amaranth	Cowpeas	African night shade	Spiderplant
1	Activities	Banana	1	0	0	0	0	0	0	0	0	0	0	0	0	0	0	0	0	0	0	0	0	0	0	0	0	0	0	0	0	0	0	0	0	0	0	0	0	0	0	0	0	0	0	0	0	0	0
2		Beans	0	1	0	0	0	0	0	0	0	0	0	0	0	0	0	0	0	0	0	0	0	0	0	0	0	0	0	0	0	0	0	0	0	0	0	0	0	0	0	0	0	0	0	0	0	0	0
3		Coffee	0	0	1	0	0	0	0	0	0	0	0	0	0	0	0	0	0	0	0	0	0	0	0	0	0	0	0	0	0	0	0	0	0	0	0	0	0	0	0	0	0	0	0	0	0	0	0
4		Groundnuts	0	0	0	1	0	0	0	0	0	0	0	0	0	0	0	0	0	0	0	0	0	0	0	0	0	0	0	0	0	0	0	0	0	0	0	0	0	0	0	0	0	0	0	0	0	0	0
5		Maize	0	0	0	0	1	0	0	0	0	0	0	0	0	0	0	0	0	0	0	0	0	0	0	0	0	0	0	0	0	0	0	0	0	0	0	0	0	0	0	0	0	0	0	0	0	0	0
6		Sugarcane	0	0	0	0	0	1	0	0	0	0	0	0	0	0	0	0	0	0	0	0	0	0	0	0	0	0	0	0	0	0	0	0	0	0	0	0	0	0	0	0	0	0	0	0	0	0	0
7		Sweet potatoes	0	0	0	0	0	0	1	0	0	0	0	0	0	0	0	0	0	0	0	0	0	0	0	0	0	0	0	0	0	0	0	0	0	0	0	0	0	0	0	0	0	0	0	0	0	0	0
8		Napier grass	0	0	0	0	0	0	0	1	0	0	0	0	0	0	0	0	0	0	0	0	0	0	0	0	0	0	0	0	0	0	0	0	0	0	0	0	0	0	0	0	0	0	0	0	0	0	0
9		Tea	0	0	0	0	0	0	0	0	1	0	0	0	0	0	0	0	0	0	0	0	0	0	0	0	0	0	0	0	0	0	0	0	0	0	0	0	0	0	0	0	0	0	0	0	0	0	0
10		Cabbages	0	0	0	0	0	0	0	0	0	1	0	0	0	0	0	0	0	0	0	0	0	0	0	0	0	0	0	0	0	0	0	0	0	0	0	0	0	0	0	0	0	0	0	0	0	0	0
11		Irish potatoes	0	0	0	0	0	0	0	0	0	0	1	0	0	0	0	0	0	0	0	0	0	0	0	0	0	0	0	0	0	0	0	0	0	0	0	0	0	0	0	0	0	0	0	0	0	0	0
12		Spinach	0	0	0	0	0	0	0	0	0	0	0	1	0	0	0	0	0	0	0	0	0	0	0	0	0	0	0	0	0	0	0	0	0	0	0	0	0	0	0	0	0	0	0	0	0	0	0
13		Pumpkins	0	0	0	0	0	0	0	0	0	0	0	0	1	0	0	0	0	0	0	0	0	0	0	0	0	0	0	0	0	0	0	0	0	0	0	0	0	0	0	0	0	0	0	0	0	0	0
14		Kales/sukuma wiki	0	0	0	0	0	0	0	0	0	0	0	0	0	1	0	0	0	0	0	0	0	0	0	0	0	0	0	0	0	0	0	0	0	0	0	0	0	0	0	0	0	0	0	0	0	0	0
15		Other food crops	0	0	0	0	0	0	0	0	0	0	0	0	0	0	1	0	0	0	0	0	0	0	0	0	0	0	0	0	0	0	0	0	0	0	0	0	0	0	0	0	0	0	0	0	0	0	0
16		Amaranth	0	0	0	0	0	0	0	0	0	0	0	0	0	0	0	1	0	0	0	0	0	0	0	0	0	0	0	0	0	0	0	0	0	0	0	0	0	0	0	0	0	0	0	0	0	0	0
17		Cowpeas	0	0	0	0	0	0	0	0	0	0	0	0	0	0	0	0	1	0	0	0	0	0	0	0	0	0	0	0	0	0	0	0	0	0	0	0	0	0	0	0	0	0	0	0	0	0	0
18		African night shade	0	0	0	0	0	0	0	0	0	0	0	0	0	0	0	0	0	1	0	0	0	0	0	0	0	0	0	0	0	0	0	0	0	0	0	0	0	0	0	0	0	0	0	0	0	0	0
19		Spiderplant	0	0	0	0	0	0	0	0	0	0	0	0	0	0	0	0	0	0	1	0	0	0	0	0	0	0	0	0	0	0	0	0	0	0	0	0	0	0	0	0	0	0	0	0	0	0	0
20		Ethiopian kale	0	0	0	0	0	0	0	0	0	0	0	0	0	0	0	0	0	0	0	1	0	0	0	0	0	0	0	0	0	0	0	0	0	0	0	0	0	0	0	0	0	0	0	0	0	0	0
21		Mitoo	0	0	0	0	0	0	0	0	0	0	0	0	0	0	0	0	0	0	0	0	1	0	0	0	0	0	0	0	0	0	0	0	0	0	0	0	0	0	0	0	0	0	0	0	0	0	0
22		Other ind. veg	0	0	0	0	0	0	0	0	0	0	0	0	0	0	0	0	0	0	0	0	0	1	0	0	0	0	0	0	0	0	0	0	0	0	0	0	0	0	0	0	0	0	0	0	0	0	0
23		Livestock	0	0	0	0	0	0	0	0	0	0	0	0	0	0	0	0	0	0	0	0	0	0	1	0	0	0	0	0	0	0	0	0	0	0	0	0	0	0	0	0	0	0	0	0	0	0	0
24		Hunting, collecting, logging	0	0	0	0	0	0	0	0	0	0	0	0	0	0	0	0	0	0	0	0	0	0	0	1	0	0	0	0	0	0	0	0	0	0	0	0	0	0	0	0	0	0	0	0	0	0	0
25		Firewood + coal	0	0	0	0	0	0	0	0	0	0	0	0	0	0	0	0	0	0	0	0	0	0	0	0	1	0	0	0	0	0	0	0	0	0	0	0	0	0	0	0	0	0	0	0	0	0	0
26		Wage employment agr. sector	0	0	0	0	0	0	0	0	0	0	0	0	0	0	0	0	0	0	0	0	0	0	0	0	0	1	0	0	0	0	0	0	0	0	0	0	0	0	0	0	0	0	0	0	0	0	0
27		Wage emploment non-agr. sector	0	0	0	0	0	0	0	0	0	0	0	0	0	0	0	0	0	0	0	0	0	0	0	0	0	0	1	0	0	0	0	0	0	0	0	0	0	0	0	0	0	0	0	0	0	0	0
28		Own business activity	0	0	0	0	0	0	0	0	0	0	0	0	0	0	0	0	0	0	0	0	0	0	0	0	0	0	0	1	0	0	0	0	0	0	0	0	0	0	0	0	0	0	0	0	0	0	0
29	Commodities	Banana	0	0	0	0	0	0	0	0	0	0	0	0	0	0	0	0	0	0	0	0	0	0	0	0	0	0	0	0	1	0	0	0	0	0	0	0	0	0	0	0	0	0	0	0	0	0	0
30		Beans	0	0	0	0	0	0	0	0	0	0	0	0	0	0	0	0	0	0	0	0	0	0	0	0	0	0	0	0	0	1	0	0	0	0	0	0	0	0	0	0	0	0	0	0	0	0	0
31		Coffee	0	0	0	0	0	0	0	0	0	0	0	0	0	0	0	0	0	0	0	0	0	0	0	0	0	0	0	0	0	0	1	0	0	0	0	0	0	0	0	0	0	0	0	0	0	0	0
32		Groundnuts	0	0	0	0	0	0	0	0	0	0	0	0	0	0	0	0	0	0	0	0	0	0	0	0	0	0	0	0	0	0	0	1	0	0	0	0	0	0	0	0	0	0	0	0	0	0	0
33		Maize	0	0	0	0	0	0	0	0	0	0	0	0	0	0	0	0	0	0	0	0	0	0	0	0	0	0	0	0	0	0	0	0	1	0	0	0	0	0	0	0	0	0	0	0	0	0	0
34		Sugarcane	0	0	0	0	0	0	0	0	0	0	0	0	0	0	0	0	0	0	0	0	0	0	0	0	0	0	0	0	0	0	0	0	0	1	0	0	0	0	0	0	0	0	0	0	0	0	0
35		Sweet potatoes	0	0	0	0	0	0	0	0	0	0	0	0	0	0	0	0	0	0	0	0	0	0	0	0	0	0	0	0	0	0	0	0	0	0	1	0	0	0	0	0	0	0	0	0	0	0	0
36		Napier grass	0	0	0	0	0	0	0	0	0	0	0	0	0	0	0	0	0	0	0	0	0	0	0	0	0	0	0	0	0	0	0	0	0	0	0	1	0	0	0	0	0	0	0	0	0	0	0
37		Tea	0	0	0	0	0	0	0	0	0	0	0	0	0	0	0	0	0	0	0	0	0	0	0	0	0	0	0	0	0	0	0	0	0	0	0	0	1	0	0	0	0	0	0	0	0	0	0
38		Cabbages	0	0	0	0	0	0	0	0	0	0	0	0	0	0	0	0	0	0	0	0	0	0	0	0	0	0	0	0	0	0	0	0	0	0	0	0	0	1	0	0	0	0	0	0	0	0	0
39		Irish potatoes	0	0	0	0	0	0	0	0	0	0	0	0	0	0	0	0	0	0	0	0	0	0	0	0	0	0	0	0	0	0	0	0	0	0	0	0	0	0	1	0	0	0	0	0	0	0	0
40		Spinach	0	0	0	0	0	0	0	0	0	0	0	0	0	0	0	0	0	0	0	0	0	0	0	0	0	0	0	0	0	0	0	0	0	0	0	0	0	0	0	1	0	0	0	0	0	0	0
41		Pumpkins	0	0	0	0	0	0	0	0	0	0	0	0	0	0	0	0	0	0	0	0	0	0	0	0	0	0	0	0	0	0	0	0	0	0	0	0	0	0	0	0	1	0	0	0	0	0	0
42		Kales/sukuma wiki	0	0	0	0	0	0	0	0	0	0	0	0	0	0	0	0	0	0	0	0	0	0	0	0	0	0	0	0	0	0	0	0	0	0	0	0	0	0	0	0	0	1	0	0	0	0	0
43		Other food crops	0	0	0	0	0	0	0	0	0	0	0	0	0	0	0	0	0	0	0	0	0	0	0	0	0	0	0	0	0	0	0	0	0	0	0	0	0	0	0	0	0	0	1	0	0	0	0
44		Amaranth	0	0	0	0	0	0	0	0	0	0	0	0	0	0	0	0	0	0	0	0	0	0	0	0	0	0	0	0	0	0	0	0	0	0	0	0	0	0	0	0	0	0	0	1	0	0	0
45		Cowpeas	0	0	0	0	0	0	0	0	0	0	0	0	0	0	0	0	0	0	0	0	0	0	0	0	0	0	0	0	0	0	0	0	0	0	0	0	0	0	0	0	0	0	0	0	1	0	0
46		African night shade	0	0	0	0	0	0	0	0	0	0	0	0	0	0	0	0	0	0	0	0	0	0	0	0	0	0	0	0	0	0	0	0	0	0	0	0	0	0	0	0	0	0	0	0	0	1	0
47		Spiderplant	0	0	0	0	0	0	0	0	0	0	0	0	0	0	0	0	0	0	0	0	0	0	0	0	0	0	0	0	0	0	0	0	0	0	0	0	0	0	0	0	0	0	0	0	0	0	1
48		Ethiopian Kale	0	0	0	0	0	0	0	0	0	0	0	0	0	0	0	0	0	0	0	0	0	0	0	0	0	0	0	0	0	0	0	0	0	0	0	0	0	0	0	0	0	0	0	0	0	0	0
49		Other ind. veg	0	0	0	0	0	0	0	0	0	0	0	0	0	0	0	0	0	0	0	0	0	0	0	0	0	0	0	0	0	0	0	0	0	0	0	0	0	0	0	0	0	0	0	0	0	0	0
50		Livestock (meat)	0	0	0	0	0	0	0	0	0	0	0	0	0	0	0	0	0	0	0	0	0	0	0	0	0	0	0	0	0	0	0	0	0	0	0	0	0	0	0	0	0	0	0	0	0	0	0
51		Livestock products (food)	0	0	0	0	0	0	0	0	0	0	0	0	0	0	0	0	0	0	0	0	0	0	0	0	0	0	0	0	0	0	0	0	0	0	0	0	0	0	0	0	0	0	0	0	0	0	0
52		Livestock products (dung)	0	0	0	0	0	0	0	0	0	0	0	0	0	0	0	0	0	0	0	0	0	0	0	0	0	0	0	0	0	0	0	0	0	0	0	0	0	0	0	0	0	0	0	0	0	0	0
53		Firewood	0	0	0	0	0	0	0	0	0	0	0	0	0	0	0	0	0	0	0	0	0	0	0	0	0	0	0	0	0	0	0	0	0	0	0	0	0	0	0	0	0	0	0	0	0	0	0
54		Coal	0	0	0	0	0	0	0	0	0	0	0	0	0	0	0	0	0	0	0	0	0	0	0	0	0	0	0	0	0	0	0	0	0	0	0	0	0	0	0	0	0	0	0	0	0	0	0
55		Oil and gas	0	0	0	0	0	0	0	0	0	0	0	0	0	0	0	0	0	0	0	0	0	0	0	0	0	0	0	0	0	0	0	0	0	0	0	0	0	0	0	0	0	0	0	0	0	0	0
56		Processed food	0	0	0	0	0	0	0	0	0	0	0	0	0	0	0	0	0	0	0	0	0	0	0	0	0	0	0	0	0	0	0	0	0	0	0	0	0	0	0	0	0	0	0	0	0	0	0
57		Leisure goods	0	0	0	0	0	0	0	0	0	0	0	0	0	0	0	0	0	0	0	0	0	0	0	0	0	0	0	0	0	0	0	0	0	0	0	0	0	0	0	0	0	0	0	0	0	0	0
58		Necessities and utensils	0	0	0	0	0	0	0	0	0	0	0	0	0	0	0	0	0	0	0	0	0	0	0	0	0	0	0	0	0	0	0	0	0	0	0	0	0	0	0	0	0	0	0	0	0	0	0
59	Factors	peri-urban land (rented)	0	0	0	0	0	0	0	0	0	0	0	0	0	0	0	0	0	0	0	0	0	0	0	0	0	0	0	0	0	0	0	0	0	0	0	0	0	0	0	0	0	0	0	0	0	0	0
60		peri-urban land (owned)	0	0	0	0	0	0	0	0	0	0	0	0	0	0	0	0	0	0	0	0	0	0	0	0	0	0	0	0	0	0	0	0	0	0	0	0	0	0	0	0	0	0	0	0	0	0	0
61		rural land (rented)	0	0	0	0	0	0	0	0	0	0	0	0	0	0	0	0	0	0	0	0	0	0	0	0	0	0	0	0	0	0	0	0	0	0	0	0	0	0	0	0	0	0	0	0	0	0	0
62		rural land (owned)	0	0	0	0	0	0	0	0	0	0	0	0	0	0	0	0	0	0	0	0	0	0	0	0	0	0	0	0	0	0	0	0	0	0	0	0	0	0	0	0	0	0	0	0	0	0	0
63		family labour	0	0	0	0	0	0	0	0	0	0	0	0	0	0	0	0	0	0	0	0	0	0	0	0	0	0	0	0	0	0	0	0	0	0	0	0	0	0	0	0	0	0	0	0	0	0	0
64		hired labour	0	0	0	0	0	0	0	0	0	0	0	0	0	0	0	0	0	0	0	0	0	0	0	0	0	0	0	0	0	0	0	0	0	0	0	0	0	0	0	0	0	0	0	0	0	0	0
65		Seeds	0	0	0	0	0	0	0	0	0	0	0	0	0	0	0	0	0	0	0	0	0	0	0	0	0	0	0	0	0	0	0	0	0	0	0	0	0	0	0	0	0	0	0	0	0	0	0
66		Fertilizer (bought)	0	0	0	0	0	0	0	0	0	0	0	0	0	0	0	0	0	0	0	0	0	0	0	0	0	0	0	0	0	0	0	0	0	0	0	0	0	0	0	0	0	0	0	0	0	0	0
67		Pesticides	0	0	0	0	0	0	0	0	0	0	0	0	0	0	0	0	0	0	0	0	0	0	0	0	0	0	0	0	0	0	0	0	0	0	0	0	0	0	0	0	0	0	0	0	0	0	0
68		Machinery	0	0	0	0	0	0	0	0	0	0	0	0	0	0	0	0	0	0	0	0	0	0	0	0	0	0	0	0	0	0	0	0	0	0	0	0	0	0	0	0	0	0	0	0	0	0	0
69		Irrigation water	0	0	0	0	0	0	0	0	0	0	0	0	0	0	0	0	0	0	0	0	0	0	0	0	0	0	0	0	0	0	0	0	0	0	0	0	0	0	0	0	0	0	0	0	0	0	0
70		Livestock feed/vetinary/other costs	0	0	0	0	0	0	0	0	0	0	0	0	0	0	0	0	0	0	0	0	0	0	0	0	0	0	0	0	0	0	0	0	0	0	0	0	0	0	0	0	0	0	0	0	0	0	0
71		Agricultural profit	0	0	0	0	0	0	0	0	0	0	0	0	0	0	0	0	0	0	0	0	0	0	0	0	0	0	0	0	0	0	0	0	0	0	0	0	0	0	0	0	0	0	0	0	0	0	0
72		Credits/capital	0	0	0	0	0	0	0	0	0	0	0	0	0	0	0	0	0	0	0	0	0	0	0	0	0	0	0	0	0	0	0	0	0	0	0	0	0	0	0	0	0	0	0	0	0	0	0
73	Households	Food-insecure rural households	0	0	0	0	0	0	0	0	0	0	0	0	0	0	0	0	0	0	0	0	0	0	0	0	0	0	0	0	0	0	0	0	0	0	0	0	0	0	0	0	0	0	0	0	0	0	0
74		Food-secure rural households	0	0	0	0	0	0	0	0	0	0	0	0	0	0	0	0	0	0	0	0	0	0	0	0	0	0	0	0	0	0	0	0	0	0	0	0	0	0	0	0	0	0	0	0	0	0	0
75		Food-insecure peri-urban households	0	0	0	0	0	0	0	0	0	0	0	0	0	0	0	0	0	0	0	0	0	0	0	0	0	0	0	0	0	0	0	0	0	0	0	0	0	0	0	0	0	0	0	0	0	0	0
76		Food-secure peri-urban households	0	0	0	0	0	0	0	0	0	0	0	0	0	0	0	0	0	0	0	0	0	0	0	0	0	0	0	0	0	0	0	0	0	0	0	0	0	0	0	0	0	0	0	0	0	0	0
			1	2	3	4	5	6	7	8	9	10	11	12	13	14	15	16	17	18	19	20	21	22	23	24	25	26	27	28	29	30	31	32	33	34	35	36	37	38	39	40	41	42	43	44	45	46	47
			Activities																												Commodities
		MC	Banana	Beans	Coffee	Groundnuts	Maize	Sugarcane	Sweet potatoes	Napier grass	Tea	Cabbages	Irish potatoes	Spinach	Pumpkins	Kales/sukuma wiki	Other food crops	Amaranth	Cowpeas	African night shade	Spiderplant	Ethiopian kale	Mitoo	Other ind. veg	Livestock	Hunting, collecting, logging	Firewood + coal	Wage employment agr. sector	Wage emploment non-agr. sector	Own business activity	Banana	Beans	Coffee	Groundnuts	Maize	Sugarcane	Sweet potatoes	Napier grass	Tea	Cabbages	Irish potatoes	Spinach	Pumpkins	Kales/sukuma wiki	Other food crops	Amaranth	Cowpeas	African night shade	Spiderplant
1	Activities	Banana	0	0	0	0	0	0	0	0	0	0	0	0	0	0	0	0	0	0	0	0	0	0	0	0	0	0	0	0	1	0	0	0	0	0	0	0	0	0	0	0	0	0	0	0	0	0	0
2		Beans	0	0	0	0	0	0	0	0	0	0	0	0	0	0	0	0	0	0	0	0	0	0	0	0	0	0	0	0	0	1	0	0	0	0	0	0	0	0	0	0	0	0	0	0	0	0	0
3		Coffee	0	0	0	0	0	0	0	0	0	0	0	0	0	0	0	0	0	0	0	0	0	0	0	0	0	0	0	0	0	0	1	0	0	0	0	0	0	0	0	0	0	0	0	0	0	0	0
4		Groundnuts	0	0	0	0	0	0	0	0	0	0	0	0	0	0	0	0	0	0	0	0	0	0	0	0	0	0	0	0	0	0	0	0.645357	0	0	0	0	0	0	0	0	0	0	0	0	0	0	0
5		Maize	0	0	0	0	0	0	0	0	0	0	0	0	0	0	0	0	0	0	0	0	0	0	0	0	0	0	0	0	0	0	0	0	1	0	0	0	0	0	0	0	0	0	0	0	0	0	0
6		Sugarcane	0	0	0	0	0	0	0	0	0	0	0	0	0	0	0	0	0	0	0	0	0	0	0	0	0	0	0	0	0	0	0	0	0	1	0	0	0	0	0	0	0	0	0	0	0	0	0
7		Sweet potatoes	0	0	0	0	0	0	0	0	0	0	0	0	0	0	0	0	0	0	0	0	0	0	0	0	0	0	0	0	0	0	0	0	0	0	1	0	0	0	0	0	0	0	0	0	0	0	0
8		Napier grass	0	0	0	0	0	0	0	0	0	0	0	0	0	0	0	0	0	0	0	0	0	0	0	0	0	0	0	0	0	0	0	0	0	0	0	1	0	0	0	0	0	0	0	0	0	0	0
9		Tea	0	0	0	0	0	0	0	0	0	0	0	0	0	0	0	0	0	0	0	0	0	0	0	0	0	0	0	0	0	0	0	0	0	0	0	0	0.475749	0	0	0	0	0	0	0	0	0	0
10		Cabbages	0	0	0	0	0	0	0	0	0	0	0	0	0	0	0	0	0	0	0	0	0	0	0	0	0	0	0	0	0	0	0	0	0	0	0	0	0	1	0	0	0	0	0	0	0	0	0
11		Irish potatoes	0	0	0	0	0	0	0	0	0	0	0	0	0	0	0	0	0	0	0	0	0	0	0	0	0	0	0	0	0	0	0	0	0	0	0	0	0	0	0.353552	0	0	0	0	0	0	0	0
12		Spinach	0	0	0	0	0	0	0	0	0	0	0	0	0	0	0	0	0	0	0	0	0	0	0	0	0	0	0	0	0	0	0	0	0	0	0	0	0	0	0	1	0	0	0	0	0	0	0
13		Pumpkins	0	0	0	0	0	0	0	0	0	0	0	0	0	0	0	0	0	0	0	0	0	0	0	0	0	0	0	0	0	0	0	0	0	0	0	0	0	0	0	0	0.4124	0	0	0	0	0	0
14		Kales/sukuma wiki	0	0	0	0	0	0	0	0	0	0	0	0	0	0	0	0	0	0	0	0	0	0	0	0	0	0	0	0	0	0	0	0	0	0	0	0	0	0	0	0	0	1	0	0	0	0	0
15		Other food crops	0	0	0	0	0	0	0	0	0	0	0	0	0	0	0	0	0	0	0	0	0	0	0	0	0	0	0	0	0	0	0	0	0	0	0	0	0	0	0	0	0	0	0.317399	0	0	0	0
16		Amaranth	0	0	0	0	0	0	0	0	0	0	0	0	0	0	0	0	0	0	0	0	0	0	0	0	0	0	0	0	0	0	0	0	0	0	0	0	0	0	0	0	0	0	0	1	0	0	0
17		Cowpeas	0	0	0	0	0	0	0	0	0	0	0	0	0	0	0	0	0	0	0	0	0	0	0	0	0	0	0	0	0	0	0	0	0	0	0	0	0	0	0	0	0	0	0	0	1	0	0
18		African night shade	0	0	0	0	0	0	0	0	0	0	0	0	0	0	0	0	0	0	0	0	0	0	0	0	0	0	0	0	0	0	0	0	0	0	0	0	0	0	0	0	0	0	0	0	0	1	0
19		Spiderplant	0	0	0	0	0	0	0	0	0	0	0	0	0	0	0	0	0	0	0	0	0	0	0	0	0	0	0	0	0	0	0	0	0	0	0	0	0	0	0	0	0	0	0	0	0	0	1
20		Ethiopian kale	0	0	0	0	0	0	0	0	0	0	0	0	0	0	0	0	0	0	0	0	0	0	0	0	0	0	0	0	0	0	0	0	0	0	0	0	0	0	0	0	0	0	0	0	0	0	0
21		Mitoo	0	0	0	0	0	0	0	0	0	0	0	0	0	0	0	0	0	0	0	0	0	0	0	0	0	0	0	0	0	0	0	0	0	0	0	0	0	0	0	0	0	0	0	0	0	0	0
22		Other ind. veg	0	0	0	0	0	0	0	0	0	0	0	0	0	0	0	0	0	0	0	0	0	0	0	0	0	0	0	0	0	0	0	0	0	0	0	0	0	0	0	0	0	0	0	0	0	0	0
23		Livestock	0	0	0	0	0	0	0	0	0	0	0	0	0	0	0	0	0	0	0	0	0	0	0	0	0	0	0	0	0	0	0	0	0	0	0	0	0	0	0	0	0	0	0	0	0	0	0
24		Hunting, collecting, logging	0	0	0	0	0	0	0	0	0	0	0	0	0	0	0	0	0	0	0	0	0	0	0	0	0	0	0	0	0	0	0	0	0	0	0	0	0	0	0	0	0	0	0	0	0	0	0
25		Firewood + coal	0	0	0	0	0	0	0	0	0	0	0	0	0	0	0	0	0	0	0	0	0	0	0	0	0	0	0	0	0	0	0	0	0	0	0	0	0	0	0	0	0	0	0	0	0	0	0
26		Wage employment agr. sector	0	0	0	0	0	0	0	0	0	0	0	0	0	0	0	0	0	0	0	0	0	0	0	0	0	0	0	0	0	0	0	0	0	0	0	0	0	0	0	0	0	0	0	0	0	0	0
27		Wage emploment non-agr. sector	0	0	0	0	0	0	0	0	0	0	0	0	0	0	0	0	0	0	0	0	0	0	0	0	0	0	0	0	0	0	0	0	0	0	0	0	0	0	0	0	0	0	0	0	0	0	0
28		Own business activity	0	0	0	0	0	0	0	0	0	0	0	0	0	0	0	0	0	0	0	0	0	0	0	0	0	0	0	0	0	0	0	0	0	0	0	0	0	0	0	0	0	0	0	0	0	0	0
29	Commodities	Banana	0	0	0	0	0	0	0	0	0	0	0	0	0	0	0	0	0	0	0	0	0	0	0	0	0	0	0	0	0	0	0	0	0	0	0	0	0	0	0	0	0	0	0	0	0	0	0
30		Beans	0	0	0	0	0	0	0	0	0	0	0	0	0	0	0	0	0	0	0	0	0	0	0	0	0	0	0	0	0	0	0	0	0	0	0	0	0	0	0	0	0	0	0	0	0	0	0
31		Coffee	0	0	0	0	0	0	0	0	0	0	0	0	0	0	0	0	0	0	0	0	0	0	0	0	0	0	0	0	0	0	0	0	0	0	0	0	0	0	0	0	0	0	0	0	0	0	0
32		Groundnuts	0	0	0	0	0	0	0	0	0	0	0	0	0	0	0	0	0	0	0	0	0	0	0	0	0	0	0	0	0	0	0	0	0	0	0	0	0	0	0	0	0	0	0	0	0	0	0
33		Maize	0	0	0	0	0	0	0	0	0	0	0	0	0	0	0	0	0	0	0	0	0	0	0	0	0	0	0	0	0	0	0	0	0	0	0	0	0	0	0	0	0	0	0	0	0	0	0
34		Sugarcane	0	0	0	0	0	0	0	0	0	0	0	0	0	0	0	0	0	0	0	0	0	0	0	0	0	0	0	0	0	0	0	0	0	0	0	0	0	0	0	0	0	0	0	0	0	0	0
35		Sweet potatoes	0	0	0	0	0	0	0	0	0	0	0	0	0	0	0	0	0	0	0	0	0	0	0	0	0	0	0	0	0	0	0	0	0	0	0	0	0	0	0	0	0	0	0	0	0	0	0
36		Napier grass	0	0	0	0	0	0	0	0	0	0	0	0	0	0	0	0	0	0	0	0	0	0	0.17947	0	0	0	0	0	0	0	0	0	0	0	0	0	0	0	0	0	0	0	0	0	0	0	0
37		Tea	0	0	0	0	0	0	0	0	0	0	0	0	0	0	0	0	0	0	0	0	0	0	0	0	0	0	0	0	0	0	0	0	0	0	0	0	0	0	0	0	0	0	0	0	0	0	0
38		Cabbages	0	0	0	0	0	0	0	0	0	0	0	0	0	0	0	0	0	0	0	0	0	0	0	0	0	0	0	0	0	0	0	0	0	0	0	0	0	0	0	0	0	0	0	0	0	0	0
39		Irish potatoes	0	0	0	0	0	0	0	0	0	0	0	0	0	0	0	0	0	0	0	0	0	0	0	0	0	0	0	0	0	0	0	0	0	0	0	0	0	0	0	0	0	0	0	0	0	0	0
40		Spinach	0	0	0	0	0	0	0	0	0	0	0	0	0	0	0	0	0	0	0	0	0	0	0	0	0	0	0	0	0	0	0	0	0	0	0	0	0	0	0	0	0	0	0	0	0	0	0
41		Pumpkins	0	0	0	0	0	0	0	0	0	0	0	0	0	0	0	0	0	0	0	0	0	0	0	0	0	0	0	0	0	0	0	0	0	0	0	0	0	0	0	0	0	0	0	0	0	0	0
42		Kales/sukuma wiki	0	0	0	0	0	0	0	0	0	0	0	0	0	0	0	0	0	0	0	0	0	0	0	0	0	0	0	0	0	0	0	0	0	0	0	0	0	0	0	0	0	0	0	0	0	0	0
43		Other food crops	0	0	0	0	0	0	0	0	0	0	0	0	0	0	0	0	0	0	0	0	0	0	4.35615e-05	0	0	0	0	0	0	0	0	0	0	0	0	0	0	0	0	0	0	0	0	0	0	0	0
44		Amaranth	0	0	0	0	0	0	0	0	0	0	0	0	0	0	0	0	0	0	0	0	0	0	0	0	0	0	0	0	0	0	0	0	0	0	0	0	0	0	0	0	0	0	0	0	0	0	0
45		Cowpeas	0	0	0	0	0	0	0	0	0	0	0	0	0	0	0	0	0	0	0	0	0	0	0	0	0	0	0	0	0	0	0	0	0	0	0	0	0	0	0	0	0	0	0	0	0	0	0
46		African night shade	0	0	0	0	0	0	0	0	0	0	0	0	0	0	0	0	0	0	0	0	0	0	0	0	0	0	0	0	0	0	0	0	0	0	0	0	0	0	0	0	0	0	0	0	0	0	0
47		Spiderplant	0	0	0	0	0	0	0	0	0	0	0	0	0	0	0	0	0	0	0	0	0	0	0	0	0	0	0	0	0	0	0	0	0	0	0	0	0	0	0	0	0	0	0	0	0	0	0
48		Ethiopian Kale	0	0	0	0	0	0	0	0	0	0	0	0	0	0	0	0	0	0	0	0	0	0	0	0	0	0	0	0	0	0	0	0	0	0	0	0	0	0	0	0	0	0	0	0	0	0	0
49		Other ind. veg	0	0	0	0	0	0	0	0	0	0	0	0	0	0	0	0	0	0	0	0	0	0	0	0	0	0	0	0	0	0	0	0	0	0	0	0	0	0	0	0	0	0	0	0	0	0	0
50		Livestock (meat)	0	0	0	0	0	0	0	0	0	0	0	0	0	0	0	0	0	0	0	0	0	0	0	0	0	0	0	0	0	0	0	0	0	0	0	0	0	0	0	0	0	0	0	0	0	0	0
51		Livestock products (food)	0	0	0	0	0	0	0	0	0	0	0	0	0	0	0	0	0	0	0	0	0	0	0	0	0	0	0	0	0	0	0	0	0	0	0	0	0	0	0	0	0	0	0	0	0	0	0
52		Livestock products (dung)	0.0350595	0.011441	0.0581422	0.0214951	0.0097984	0.0013453	0.0100914	0.0337962	0.0106153	0.0721468	0.0831439	0.0587417	0.10987	0.116689	0.0121706	0.0830743	0.108394	0.0666945	0.110467	0.0646163	0.0858087	0.017169	0	0	0	0	0	0	0	0	0	0	0	0	0	0	0	0	0	0	0	0	0	0	0	0	0
53		Firewood	0	0	0	0	0	0	0	0	0	0	0	0	0	0	0	0	0	0	0	0	0	0	0	0	0	0	0	0	0	0	0	0	0	0	0	0	0	0	0	0	0	0	0	0	0	0	0
54		Coal	0	0	0	0	0	0	0	0	0	0	0	0	0	0	0	0	0	0	0	0	0	0	0	0	0	0	0	0	0	0	0	0	0	0	0	0	0	0	0	0	0	0	0	0	0	0	0
55		Oil and gas	0	0	0	0	0	0	0	0	0	0	0	0	0	0	0	0	0	0	0	0	0	0	0	0	0	0	0	0	0	0	0	0	0	0	0	0	0	0	0	0	0	0	0	0	0	0	0
56		Processed food	0	0	0	0	0	0	0	0	0	0	0	0	0	0	0	0	0	0	0	0	0	0	0	0	0	0	0	0	0	0	0	0	0	0	0	0	0	0	0	0	0	0	0	0	0	0	0
57		Leisure goods	0	0	0	0	0	0	0	0	0	0	0	0	0	0	0	0	0	0	0	0	0	0	0	0	0	0	0	0	0	0	0	0	0	0	0	0	0	0	0	0	0	0	0	0	0	0	0
58		Necessities and utensils	0	0	0	0	0	0	0	0	0	0	0	0	0	0	0	0	0	0	0	0	0	0	0	0	0	0	0	0	0	0	0	0	0	0	0	0	0	0	0	0	0	0	0	0	0	0	0
59	Factors	peri-urban land (rented)	0.000111589	0.00734472	0	0	0.00860855	0	0	0.000785889	0	0.00209687	0.0321364	0.00619651	0	0.00663133	0.00153608	0.00941224	0.00863918	0.00585555	0.00798262	0.00794442	0	5.29414e-05	0	0	0	0	0	0	0	0	0	0	0	0	0	0	0	0	0	0	0	0	0	0	0	0	0
60		peri-urban land (owned)	0.0268247	0.223825	0.480213	0	0.253733	0.00931013	0.0147024	0.0790958	0.130845	0.2133	0.769611	0.235148	0.066293	0.169064	0.0459432	0.13707	0.136752	0.104634	0.220912	0.10723	0.0259444	0.0110906	0	0	0	0	0	0	0	0	0	0	0	0	0	0	0	0	0	0	0	0	0	0	0	0	0
61		rural land (rented)	0.000149351	0.00576883	0	0.0328782	0.00536835	0.00894194	0.00111492	0.000116161	0.00821532	0.00183874	0.00299452	0.000119514	9.18048e-05	0.00463961	0.00325413	0.00159366	0.00722006	0.00224602	0.0015324	0.00345566	0.0618552	0	0	0	0	0	0	0	0	0	0	0	0	0	0	0	0	0	0	0	0	0	0	0	0	0	0
62		rural land (owned)	0.0352655	0.100463	0.0459794	0.235584	0.14969	0.132585	0.0631471	0.00251851	0.400859	0.0518748	0.0388311	0.000562533	0.285708	0.0569516	0.0210988	0.0666617	0.175702	0.0628232	0.0772615	0.0689718	0.167689	0.0282424	0	0	0	0	0	0	0	0	0	0	0	0	0	0	0	0	0	0	0	0	0	0	0	0	0
63		family labour	0.0217078	0.0594593	0.127067	0.143101	0.0800221	0.0178007	0.0502414	0.00746823	0.0510257	0.0767451	0.212315	0.0824554	0.356048	0.141381	0.0229397	0.100733	0.131272	0.0751907	0.09461	0.101587	0.11244	0.0240749	0.265957	0.0867859	0.0830127	1	1	1	0	0	0	0	0	0	0	0	0	0	0	0	0	0	0	0	0	0	0
64		hired labour	0.00758428	0.056902	0.084485	0.179467	0.0763113	0.0425801	0.0120559	0.0100118	0.16748	0.0393613	0.0887948	0.0403542	0.0596132	0.0404132	0.0136462	0.022291	0.0315651	0.0231362	0.0358898	0.0416383	0.0396692	0.0073299	0.0192443	0	0	0	0	0	0	0	0	0	0	0	0	0	0	0	0	0	0	0	0	0	0	0	0
65		Seeds	0.000220043	0.0618281	0	0.367381	0.0638861	0.0130863	0	7.80635e-05	3.55897e-06	0.0756389	0.122566	0.0345696	0.00164074	0.105675	0.00455162	0.0453206	0.0932585	0.0536896	0.11643	0.13324	0.101164	0.00213787	0	0	0	0	0	0	0	0	0	0	0	0	0	0	0	0	0	0	0	0	0	0	0	0	0
66		Fertilizer (bought)	0.00382205	0.0342706	0.0226223	0.0396365	0.0521694	0.0159231	0.00098717	0.00115743	0.13751	0.0108289	0.0372949	0.0138215	0.0250268	0.019395	0.00676772	0.0120256	0.0110063	0.0104298	0.0160308	0.011643	0.0102775	0.00169891	0	0	0	0	0	0	0	0	0	0	0	0	0	0	0	0	0	0	0	0	0	0	0	0	0
67		Pesticides	4.53414e-05	0.00208802	8.09097e-05	0.000231072	0.00154602	0.000689856	7.05121e-05	1.85858e-05	0.000495752	0.00798534	0.0212434	0.00707045	0.00335668	0.0145356	0.00226037	0.00546082	0.00832924	0.00663089	0.00852649	0.00700901	0.00564411	0.00178535	0	0	0	0	0	0	0	0	0	0	0	0	0	0	0	0	0	0	0	0	0	0	0	0	0
68		Machinery	0.000487563	0.015759	0.0189315	0.0243395	0.0248449	0.0125718	0.00539453	0.000562335	0.00042493	4.59456e-06	0.0108554	0.00134043	0.00979473	0.00348057	0.00392738	0.00158956	0.00457619	0.00160003	0.00199017	0.00372482	0.00568787	0.000486474	0	0	0	0	0	0	0	0	0	0	0	0	0	0	0	0	0	0	0	0	0	0	0	0	0
69		Irrigation water	0.000291371	3.19171e-05	0.000809097	0	0.000153808	0	0	0.0001301	0	0.00681526	0.00561912	0.0161264	0.013147	0.0162309	0.0020751	0.0128028	0.00248548	0.00745753	0.0159475	0.0112567	0.000262517	0.0001073	0	0	0	0	0	0	0	0	0	0	0	0	0	0	0	0	0	0	0	0	0	0	0	0	0
70		Livestock feed/vetinary/other costs	0	0	0	0	0	0	0	0	0	0	0	0	0	0	0	0	0	0	0	0	0	0	0.215715	0	0	0	0	0	0	0	0	0	0	0	0	0	0	0	0	0	0	0	0	0	0	0	0
71		Agricultural profit	0.868431	0.420819	0.16167	-0.0441132	0.273868	0.745166	0.842195	0.864261	0.0925261	0.441364	-0.425405	0.503494	0.0694099	0.304914	0.859829	0.501964	0.2808	0.579612	0.29242	0.437683	0.383557	0.905824	0.31957	0.913214	0.916987	0	0	0	0	0	0	0	0	0	0	0	0	0	0	0	0	0	0	0	0	0	0
72		Credits/capital	0	0	0	0	0	0	0	0	0	0	0	0	0	0	0	0	0	0	0	0	0	0	0	0	0	0	0	0	0	0	0	0	0	0	0	0	0	0	0	0	0	0	0	0	0	0	0
73	Households	Food-insecure rural households	0	0	0	0	0	0	0	0	0	0	0	0	0	0	0	0	0	0	0	0	0	0	0	0	0	0	0	0	0	0	0	0	0	0	0	0	0	0	0	0	0	0	0	0	0	0	0
74		Food-secure rural households	0	0	0	0	0	0	0	0	0	0	0	0	0	0	0	0	0	0	0	0	0	0	0	0	0	0	0	0	0	0	0	0	0	0	0	0	0	0	0	0	0	0	0	0	0	0	0
75		Food-insecure peri-urban households	0	0	0	0	0	0	0	0	0	0	0	0	0	0	0	0	0	0	0	0	0	0	0	0	0	0	0	0	0	0	0	0	0	0	0	0	0	0	0	0	0	0	0	0	0	0	0
76		Food-secure peri-urban households	0	0	0	0	0	0	0	0	0	0	0	0	0	0	0	0	0	0	0	0	0	0	0	0	0	0	0	0	0	0	0	0	0	0	0	0	0	0	0	0	0	0	0	0	0	0	0
			1	2	3	4	5	6	7	8	9	10	11	12	13	14	15	16	17	18	19	20	21	22	23	24	25	26	27	28	29	30	31	32	33	34	35	36	37	38	39	40	41	42	43	44	45	46	47
			Activities																												Commodities
		MM	Banana	Beans	Coffee	Groundnuts	Maize	Sugarcane	Sweet potatoes	Napier grass	Tea	Cabbages	Irish potatoes	Spinach	Pumpkins	Kales/sukuma wiki	Other food crops	Amaranth	Cowpeas	African night shade	Spiderplant	Ethiopian kale	Mitoo	Other ind. veg	Livestock	Hunting, collecting, logging	Firewood + coal	Wage employment agr. sector	Wage emploment non-agr. sector	Own business activity	Banana	Beans	Coffee	Groundnuts	Maize	Sugarcane	Sweet potatoes	Napier grass	Tea	Cabbages	Irish potatoes	Spinach	Pumpkins	Kales/sukuma wiki	Other food crops	Amaranth	Cowpeas	African night shade	Spiderplant
1	Activities	Banana	1.06399	0.0531839	0.0489142	0.0359453	0.0503548	0.0621621	0.0646695	0.0627513	0.0495508	0.0535271	0.0350882	0.0535421	0.0583107	0.0498577	0.0626896	0.0566247	0.0553891	0.057477	0.0501174	0.0521218	0.0578122	0.0644476	0.0487986	0.0651863	0.0651974	0.0625011	0.0625011	0.0625011	1.06399	0.0531839	0.0489142	0.0231975	0.0503548	0.0621621	0.0646695	0.0627513	0.0235738	0.0535271	0.0124055	0.0535421	0.0240473	0.0498577	0.0198976	0.0566247	0.0553891	0.057477	0.0501174
2		Beans	0.0552625	1.05399	0.0463337	0.069578	0.051679	0.0540347	0.0555127	0.0548942	0.0406053	0.0561797	0.0509418	0.0523333	0.0493944	0.056043	0.0548805	0.0548217	0.0581427	0.0561383	0.0576966	0.0603177	0.0595953	0.0557855	0.0427174	0.0564242	0.0564272	0.0556895	0.0556895	0.0556895	0.0552625	1.05399	0.0463337	0.0449027	0.051679	0.0540347	0.0555127	0.0548942	0.0193179	0.0561797	0.0180106	0.0523333	0.0203702	0.056043	0.017419	0.0548217	0.0581427	0.0561383	0.0576966
3		Coffee	0.00390618	0.00351629	1.00388	0.00174126	0.00331224	0.00354148	0.00387345	0.00399449	0.00247255	0.00362554	0.00372544	0.00378384	0.00326123	0.00334271	0.00388844	0.00366321	0.0033707	0.00363977	0.00340836	0.00332263	0.00319344	0.00391716	0.00311439	0.00402013	0.00401937	0.00420499	0.00420499	0.00420499	0.00390618	0.00351629	1.00388	0.00112373	0.00331224	0.00354148	0.00387345	0.00399449	0.00117631	0.00362554	0.00131714	0.00378384	0.00134493	0.00334271	0.00123419	0.00366321	0.0033707	0.00363977	0.00340836
4		Groundnuts	0.003641	0.00507818	0.00251158	1.01485	0.00500378	0.00406576	0.0036975	0.00351334	0.00301737	0.00554078	0.00575417	0.00407631	0.00348907	0.00638817	0.00369685	0.00472248	0.00637971	0.00507952	0.00676009	0.00751427	0.00688057	0.00373745	0.00273244	0.00368652	0.00368751	0.00344583	0.00344583	0.00344583	0.003641	0.00507818	0.00251158	0.654942	0.00500378	0.00406576	0.0036975	0.00351334	0.00143551	0.00554078	0.0020344	0.00407631	0.00143889	0.00638817	0.00117338	0.00472248	0.00637971	0.00507952	0.00676009
5		Maize	0.101532	0.0861673	0.0792248	0.0629148	1.08199	0.0989923	0.10267	0.0996235	0.0800602	0.0867687	0.060255	0.0861436	0.0938245	0.0813658	0.0995375	0.0911099	0.090178	0.0924123	0.0821302	0.0851514	0.0933277	0.102215	0.0775973	0.103297	0.10331	0.100042	0.100042	0.100042	0.101532	0.0861673	0.0792248	0.0406025	1.08199	0.0989923	0.10267	0.0996235	0.0380885	0.0867687	0.0213033	0.0861436	0.0386932	0.0813658	0.0315931	0.0911099	0.090178	0.0924123	0.0821302
6		Sugarcane	0.0184631	0.0147421	0.0113318	0.0125901	0.0142128	1.01907	0.0189984	0.0174646	0.017371	0.0143991	0.00521016	0.0137226	0.0187688	0.0135781	0.0178382	0.0158377	0.0165656	0.0162981	0.0135596	0.0147696	0.0181476	0.0186246	0.0136199	0.0185671	0.0185739	0.0169277	0.0169277	0.0169277	0.0184631	0.0147421	0.0113318	0.00812513	0.0142128	1.01907	0.0189984	0.0174646	0.00826422	0.0143991	0.00184207	0.0137226	0.00774026	0.0135781	0.00566182	0.0158377	0.0165656	0.0162981	0.0135596
7		Sweet potatoes	0.0155611	0.012625	0.0107635	0.00941275	0.0120016	0.0154815	1.01583	0.0150363	0.012922	0.0125734	0.00654588	0.0123561	0.0146919	0.0117648	0.0151604	0.0135315	0.0135571	0.0138296	0.0117725	0.0125207	0.0145382	0.0156912	0.0116941	0.0157868	0.0157912	0.0147331	0.0147331	0.0147331	0.0155611	0.012625	0.0107635	0.00607459	0.0120016	0.0154815	1.01583	0.0150363	0.00614763	0.0125734	0.00231431	0.0123561	0.00605895	0.0117648	0.00481191	0.0135315	0.0135571	0.0138296	0.0117725
8		Napier grass	0.0759923	0.0610345	0.0652437	0.0432188	0.057578	0.0678717	0.0724414	1.0748	0.0547487	0.0716929	0.0561777	0.0697196	0.0813544	0.0749965	0.0709473	0.0764491	0.0789217	0.0745432	0.0743957	0.0686286	0.0771728	0.0735144	0.234318	0.0716216	0.0716306	0.0694384	0.0694384	0.0694384	0.0759923	0.0610345	0.0652437	0.0278916	0.057578	0.0678717	0.0724414	1.0748	0.0260466	0.0716929	0.0198618	0.0697196	0.0335505	0.0749965	0.0225186	0.0764491	0.0789217	0.0745432	0.0743957
9		Tea	0.00852664	0.00712746	0.00640901	0.00509265	0.00681204	0.00841999	0.00865929	0.00830172	1.00708	0.00710997	0.00449741	0.00703664	0.00811697	0.00664814	0.00832889	0.00756753	0.0075532	0.00768253	0.00669473	0.00698338	0.00787549	0.00858273	0.0064774	0.00864754	0.00864887	0.00832497	0.00832497	0.00832497	0.00852664	0.00712746	0.00640901	0.00328658	0.00681204	0.00841999	0.00865929	0.00830172	0.479117	0.00710997	0.00159007	0.00703664	0.00334744	0.00664814	0.00264358	0.00756753	0.0075532	0.00768253	0.00669473
10		Cabbages	0.00572253	0.00501082	0.00515696	0.00289112	0.00474388	0.00536333	0.0057262	0.00574552	0.00404422	1.00511	0.00452694	0.00523096	0.00502627	0.00473321	0.00565624	0.0052567	0.00498738	0.00526569	0.00480449	0.004802	0.00491151	0.00574714	0.00448014	0.00585743	0.00585709	0.00593905	0.00593905	0.00593905	0.00572253	0.00501082	0.00515696	0.0018658	0.00474388	0.00536333	0.0057262	0.00574552	0.00192403	1.00511	0.00160051	0.00523096	0.00207283	0.00473321	0.00179528	0.0052567	0.00498738	0.00526569	0.00480449
11		Irish potatoes	0.00608308	0.00619239	0.00591632	0.00723178	0.00592056	0.00573686	0.00604975	0.00618345	0.00405054	0.00650047	1.00703	0.00621601	0.00522843	0.00643042	0.00609272	0.00622375	0.00640852	0.00629708	0.00665954	0.00675498	0.00626316	0.00612335	0.00482347	0.00624123	0.00624019	0.00649267	0.00649267	0.00649267	0.00608308	0.00619239	0.00591632	0.00466708	0.00592056	0.00573686	0.00604975	0.00618345	0.00192704	0.00650047	0.356037	0.00621601	0.0021562	0.00643042	0.00193382	0.00622375	0.00640852	0.00629708	0.00665954
12		Spinach	0.00389879	0.00388417	0.00448593	0.00256157	0.00367253	0.00341581	0.0038191	0.0040925	0.00214886	0.00408991	0.00514621	1.00422	0.00309409	0.00385609	0.00393277	0.00393215	0.00365316	0.00388381	0.00399071	0.00381281	0.0032759	0.00390289	0.00319466	0.00403386	0.00403214	0.00445064	0.00445064	0.00445064	0.00389879	0.00388417	0.00448593	0.00165313	0.00367253	0.00341581	0.0038191	0.0040925	0.00102232	0.00408991	0.00181945	1.00422	0.001276	0.00385609	0.00124826	0.00393215	0.00365316	0.00388381	0.00399071
13		Pumpkins	0.00227194	0.00182076	0.0015275	0.00136221	0.00172306	0.00225715	0.0023108	0.00219319	0.00185332	0.00181586	0.000882585	0.00178532	1.00212	0.00169923	0.00221323	0.0019608	0.00195715	0.0020084	0.00169514	0.00181534	0.0021213	0.00229282	0.00170341	0.00230821	0.00230894	0.00213097	0.00213097	0.00213097	0.00227194	0.00182076	0.0015275	0.000879115	0.00172306	0.00225715	0.0023108	0.00219319	0.000881716	0.00181586	0.00031204	0.00178532	0.413272	0.00169923	0.000702478	0.0019608	0.00195715	0.0020084	0.00169514
14		Kales/sukuma wiki	0.00971109	0.00930943	0.00832061	0.0107098	0.0089045	0.00942316	0.00975055	0.00966788	0.00714447	0.00964098	0.00876249	0.00914651	0.0087019	1.00949	0.00963319	0.00950141	0.00988209	0.00968251	0.00974872	0.0100983	0.0100304	0.00978974	0.00752969	0.00991407	0.00991425	0.00986955	0.00986955	0.00986955	0.00971109	0.00930943	0.00832061	0.00691164	0.0089045	0.00942316	0.00975055	0.00966788	0.00339897	0.00964098	0.003098	0.00914651	0.00358866	1.00949	0.00305757	0.00950141	0.00988209	0.00968251	0.00974872
15		Other food crops	0.172012	0.14462	0.134668	0.0986532	0.137077	0.166595	0.173666	0.169157	0.132351	0.145824	0.100968	0.14594	0.156548	0.13605	1.16873	0.153443	0.150075	0.155512	0.13706	0.141835	0.15539	0.173181	0.131649	0.175283	0.175307	0.169517	0.169517	0.169517	0.172012	0.14462	0.134668	0.0636665	0.137077	0.166595	0.173666	0.169157	0.0629658	0.145824	0.0356975	0.14594	0.0645604	0.13605	0.370953	0.153443	0.150075	0.155512	0.13706
16		Amaranth	0.0121366	0.0119959	0.00992558	0.0163479	0.0116126	0.0121653	0.0122769	0.0119298	0.00988959	0.0123694	0.0108825	0.0113126	0.0115413	0.0124232	0.0120048	1.01212	0.0132137	0.012428	0.0128228	0.0134686	0.0135597	0.0122443	0.00931637	0.0123103	0.0123108	0.012171	0.012171	0.012171	0.0121366	0.0119959	0.00992558	0.0105502	0.0116126	0.0121653	0.0122769	0.0119298	0.00470496	0.0123694	0.00384754	0.0113126	0.00475961	0.0124232	0.0038103	1.01212	0.0132137	0.012428	0.0128228
17		Cowpeas	0.0095765	0.00951565	0.00673816	0.0157054	0.00925982	0.00997774	0.00977373	0.00921639	0.00843844	0.00979074	0.00743185	0.008518	0.00945632	0.0100929	0.00942655	0.00959081	1.01101	0.00997803	0.0104121	0.0112799	0.011725	0.00969471	0.00718983	0.00966632	0.0096685	0.00913889	0.00913889	0.00913889	0.0095765	0.00951565	0.00673816	0.0101356	0.00925982	0.00997774	0.00977373	0.00921639	0.00401458	0.00979074	0.00262755	0.008518	0.00389978	0.0100929	0.00299198	0.00959081	1.01101	0.00997803	0.0104121
18		African night shade	0.0219937	0.0220313	0.0159625	0.0356183	0.021558	0.0230041	0.0224845	0.0211598	0.0200617	0.022563	0.0176409	0.019672	0.0222804	0.0231954	0.0216298	0.0221352	0.025461	1.02295	0.0239769	0.0258107	0.0268314	0.0222346	0.0165523	0.0221385	0.0221422	0.0212546	0.0212546	0.0212546	0.0219937	0.0220313	0.0159625	0.0229865	0.021558	0.0230041	0.0224845	0.0211598	0.00954432	0.022563	0.00623699	0.019672	0.00918844	0.0231954	0.00686527	0.0221352	0.025461	1.02295	0.0239769
19		Spiderplant	0.00785224	0.0105363	0.00667441	0.0266889	0.0103131	0.00826581	0.00787774	0.00780127	0.00580704	0.011476	0.0130033	0.0090534	0.0071287	0.0128267	0.00799806	0.00988397	0.0125557	0.0104445	1.01356	0.0146802	0.0130787	0.00801043	0.00607291	0.00800222	0.00800245	0.00794785	0.00794785	0.00794785	0.00785224	0.0105363	0.00667441	0.0172239	0.0103131	0.00826581	0.00787774	0.00780127	0.0027627	0.011476	0.00459735	0.0090534	0.00293987	0.0128267	0.00253858	0.00988397	0.0125557	0.0104445	1.01356
20		Ethiopian kale	0.00152017	0.00222715	0.00117101	0.00657305	0.00219042	0.00167183	0.00153112	0.00149171	0.0011576	0.00245321	0.00276442	0.00181608	0.00139646	0.00283371	0.00155818	0.00205095	0.00276393	0.00220095	0.0030079	1.00332	0.00294149	0.00156093	0.00115886	0.00154646	0.00154671	0.00148546	0.00148546	0.00148546	0.00152017	0.00222715	0.00117101	0.00424196	0.00219042	0.00167183	0.00153112	0.00149171	0.000550729	0.00245321	0.000977367	0.00181608	0.000575898	0.00283371	0.000494565	0.00205095	0.00276393	0.00220095	0.0030079
21		Mitoo	0.00061365	0.00078608	0.000369099	0.00222201	0.000770468	0.000684087	0.000625956	0.000584656	0.000518298	0.00085055	0.000775968	0.000630514	0.000587173	0.000971917	0.000616904	0.000744848	0.000991677	0.000803208	0.00102189	0.00114838	1.00109	0.000629818	0.000453183	0.00062105	0.00062132	0.000555699	0.000555699	0.000555699	0.00061365	0.00078608	0.000369099	0.00143399	0.000770468	0.000684087	0.000625956	0.000584656	0.00024658	0.00085055	0.000274345	0.000630514	0.00024215	0.000971917	0.000195805	0.000744848	0.000991677	0.000803208	0.00102189
22		Other ind. veg	0.0103426	0.00847368	0.00615734	0.00816544	0.00839704	0.01114	0.0107799	0.0095978	0.0113854	0.00808142	0.00257727	0.00743552	0.0117176	0.00769693	0.0099122	0.00898638	0.00991776	0.00924515	0.00774871	0.00845922	0.0107391	1.01041	0.00754717	0.0102603	0.0102635	0.00948286	0.00948286	0.00948286	0.0103426	0.00847368	0.00615734	0.00526963	0.00839704	0.01114	0.0107799	0.0095978	0.0054166	0.00808142	0.000911202	0.00743552	0.00483232	0.00769693	0.00314612	0.00898638	0.00991776	0.00924515	0.00774871
23		Livestock	0.423426	0.340082	0.363535	0.240813	0.320822	0.378178	0.40364	0.416793	0.305057	0.399469	0.31302	0.388475	0.453303	0.417877	0.395315	0.425971	0.439748	0.415351	0.41453	0.382395	0.430004	0.409619	1.30561	0.399072	0.399122	0.386907	0.386907	0.386907	0.423426	0.340082	0.363535	0.155411	0.320822	0.378178	0.40364	0.416793	0.145131	0.399469	0.110669	0.388475	0.186942	0.417877	0.125473	0.425971	0.439748	0.415351	0.41453
24		Hunting, collecting, logging	0.00667351	0.00536557	0.00461734	0.00385642	0.00505698	0.00656142	0.00676711	0.006478	0.00524147	0.00537889	0.00282119	0.00533004	0.00607972	0.00502229	0.00651526	0.00577635	0.00569638	0.00590682	0.0050119	0.00533562	0.00614235	0.00673447	0.00502684	1.0068	0.00679832	0.00630699	0.00630699	0.00630699	0.00667351	0.00536557	0.00461734	0.00248877	0.00505698	0.00656142	0.00676711	0.006478	0.00249362	0.00537889	0.000997439	0.00533004	0.00250728	0.00502229	0.00206794	0.00577635	0.00569638	0.00590682	0.0050119
25		Firewood + coal	0.0743066	0.0601617	0.0520669	0.0434198	0.0568884	0.0732235	0.075401	0.0721171	0.0593082	0.0602154	0.0325155	0.0595872	0.0684714	0.0562456	0.0725286	0.0645896	0.0639494	0.065975	0.0562283	0.0596667	0.068562	0.0749494	0.0560183	0.0755866	1.07561	0.0705628	0.0705628	0.0705628	0.0743066	0.0601617	0.0520669	0.0280213	0.0568884	0.0732235	0.075401	0.0721171	0.0282158	0.0602154	0.0114959	0.0595872	0.0282376	0.0562456	0.0230205	0.0645896	0.0639494	0.065975	0.0562283
26		Wage employment agr. sector	0	0	0	0	0	0	0	0	0	0	0	0	0	0	0	0	0	0	0	0	0	0	0	0	0	1	0	0	0	0	0	0	0	0	0	0	0	0	0	0	0	0	0	0	0	0	0
27		Wage emploment non-agr. sector	0	0	0	0	0	0	0	0	0	0	0	0	0	0	0	0	0	0	0	0	0	0	0	0	0	0	1	0	0	0	0	0	0	0	0	0	0	0	0	0	0	0	0	0	0	0	0
28		Own business activity	0	0	0	0	0	0	0	0	0	0	0	0	0	0	0	0	0	0	0	0	0	0	0	0	0	0	0	1	0	0	0	0	0	0	0	0	0	0	0	0	0	0	0	0	0	0	0
29	Commodities	Banana	0.0106791	0.0091851	0.00916784	0.00551161	0.00868308	0.0100998	0.0107125	0.0106526	0.00768634	0.00933587	0.00763551	0.00951075	0.00942594	0.00866043	0.01053	0.00968726	0.00924841	0.00974353	0.00876089	0.00886209	0.00928422	0.010736	0.00829636	0.0109222	0.0109223	0.0108762	0.0108762	0.0108762	1.01068	0.0091851	0.00916784	0.00355696	0.00868308	0.0100998	0.0107125	0.0106526	0.00365677	0.00933587	0.00269955	0.00951075	0.00388725	0.00866043	0.00334221	0.00968726	0.00924841	0.00974353	0.00876089
30		Beans	0.0114233	0.00985616	0.00968942	0.00616794	0.00937212	0.0109245	0.0114963	0.0113403	0.00863221	0.00995961	0.00799673	0.0100819	0.0103855	0.00926678	0.0112425	0.0103828	0.0100451	0.0104436	0.00938226	0.0095154	0.0100892	0.0114805	0.00885485	0.0116513	0.0116513	0.0116399	0.0116399	0.0116399	0.0114233	1.00986	0.00968942	0.00398052	0.00937212	0.0109245	0.0114963	0.0113403	0.00410676	0.00995961	0.00282726	0.0100819	0.00428298	0.00926678	0.00356837	0.0103828	0.0100451	0.0104436	0.00938226
31		Coffee	0.00341451	0.00307832	0.00342933	0.00148136	0.00289343	0.00307566	0.00337995	0.00350196	0.0021005	0.00318162	0.0033223	0.00333218	0.00281083	0.00293131	0.00340328	0.00320744	0.00293144	0.00318409	0.0029888	0.00290619	0.00276678	0.00342413	0.0027297	0.00351924	0.00351853	0.00369135	0.00369135	0.00369135	0.00341451	0.00307832	1.00343	0.000956009	0.00289343	0.00307566	0.00337995	0.00350196	0.000999308	0.00318162	0.00117461	0.00333218	0.00115919	0.00293131	0.0010802	0.00320744	0.00293144	0.00318409	0.0029888
32		Groundnuts	0.00331222	0.00271243	0.00235832	0.0019815	0.00258009	0.00328048	0.00336635	0.00321121	0.00272504	0.00270483	0.001522	0.00266921	0.00311974	0.00253118	0.00323127	0.00290078	0.00289503	0.00295712	0.00253707	0.00268083	0.00307647	0.00333834	0.00250103	0.00336251	0.00336328	0.00317503	0.00317503	0.00317503	0.00331222	0.00271243	0.00235832	1.00128	0.00258009	0.00328048	0.00336635	0.00321121	0.00129644	0.00270483	0.000538107	0.00266921	0.00128658	0.00253118	0.0010256	0.00290078	0.00289503	0.00295712	0.00253707
33		Maize	0.0305002	0.0257098	0.0235123	0.0180361	0.0245873	0.0299991	0.0309409	0.0297854	0.0251372	0.025679	0.0171575	0.0254981	0.0289819	0.0240033	0.0298268	0.0272346	0.0270959	0.02759	0.0242099	0.0251055	0.0280145	0.0306866	0.0232609	0.0309463	0.0309498	0.0300761	0.0300761	0.0300761	0.0305002	0.0257098	0.0235123	0.0116397	1.02459	0.0299991	0.0309409	0.0297854	0.011959	0.025679	0.00606608	0.0254981	0.0119521	0.0240033	0.00946701	0.0272346	0.0270959	0.02759	0.0242099
34		Sugarcane	0.0019989	0.00159034	0.00131497	0.00120268	0.00150335	0.00199028	0.00203433	0.00192574	0.00163404	0.00158498	0.000724192	0.00155518	0.00186008	0.00148339	0.00194584	0.00171656	0.00171578	0.00176113	0.00147751	0.00159002	0.00187209	0.00201806	0.00149459	0.00203067	0.00203137	0.00186063	0.00186063	0.00186063	0.0019989	0.00159034	0.00131497	0.000776161	0.00150335	1.00199	0.00203433	0.00192574	0.000777394	0.00158498	0.00025604	0.00155518	0.000767096	0.00148339	0.000617607	0.00171656	0.00171578	0.00176113	0.00147751
35		Sweet potatoes	0.00602321	0.00502506	0.00462631	0.00341078	0.00476742	0.00586197	0.00609083	0.00590433	0.00471611	0.00505054	0.00334734	0.00504751	0.00553235	0.00470762	0.00589984	0.00534382	0.00524183	0.0054204	0.00473603	0.004919	0.00545483	0.00606484	0.00459623	0.00613177	0.00613271	0.00590333	0.00590333	0.00590333	0.00602321	0.00502506	0.00462631	0.00220117	0.00476742	0.00586197	1.00609	0.00590433	0.00224368	0.00505054	0.00118346	0.00504751	0.00228154	0.00470762	0.00187261	0.00534382	0.00524183	0.0054204	0.00473603
36		Napier grass	0.0759923	0.0610345	0.0652437	0.0432188	0.057578	0.0678717	0.0724414	0.0748019	0.0547487	0.0716929	0.0561777	0.0697196	0.0813544	0.0749965	0.0709473	0.0764491	0.0789217	0.0745432	0.0743958	0.0686286	0.0771728	0.0735144	0.234318	0.0716216	0.0716306	0.0694384	0.0694384	0.0694384	0.0759923	0.0610345	0.0652437	0.0278916	0.057578	0.0678717	0.0724414	1.0748	0.0260466	0.0716929	0.0198618	0.0697196	0.0335505	0.0749965	0.0225186	0.0764491	0.0789217	0.0745432	0.0743958
37		Tea	0.0171863	0.0144219	0.0130573	0.0102447	0.0137928	0.0169535	0.0174487	0.0167503	0.0142655	0.0143905	0.00930898	0.014255	0.0163757	0.0134534	0.0167936	0.0152931	0.0152557	0.0155123	0.0135589	0.0141075	0.0158475	0.0172953	0.013074	0.0174292	0.0174316	0.0168447	0.0168447	0.0168447	0.0171863	0.0144219	0.0130573	0.0066115	0.0137928	0.0169535	0.0174487	0.0167503	1.00679	0.0143905	0.00329121	0.014255	0.00675335	0.0134534	0.00533027	0.0152931	0.0152557	0.0155123	0.0135589
38		Cabbages	0.00481459	0.00418088	0.00423289	0.00246926	0.00395898	0.00453997	0.00482591	0.0048153	0.00346059	0.00425165	0.00361875	0.00433991	0.00425894	0.00394304	0.00475176	0.00439639	0.00419164	0.00441254	0.00399642	0.0040184	0.00416641	0.00483736	0.0037538	0.00492393	0.00492382	0.00495124	0.00495124	0.00495124	0.00481459	0.00418088	0.00423289	0.00159355	0.00395898	0.00453997	0.00482591	0.0048153	0.00164637	1.00425	0.00127942	0.00433991	0.00175639	0.00394304	0.0015082	0.00439639	0.00419164	0.00441254	0.00399642
39		Irish potatoes	0.0104069	0.00933831	0.0101628	0.00482116	0.00882177	0.00952558	0.0103466	0.0105942	0.00684975	0.00959349	0.00959941	0.00996136	0.00886031	0.00885713	0.0103404	0.00973167	0.0090419	0.00968298	0.00902878	0.00884109	0.00862253	0.010437	0.00826445	0.0106892	0.0106874	0.0111312	0.0111312	0.0111312	0.0104069	0.00933831	0.0101628	0.00311137	0.00882177	0.00952558	0.0103466	0.0105942	0.00325876	0.00959349	1.00339	0.00996136	0.00365399	0.00885713	0.00328203	0.00973167	0.0090419	0.00968298	0.00902878
40		Spinach	6.8339e-05	6.37003e-05	7.40733e-05	2.83561e-05	6.01404e-05	6.06139e-05	6.73835e-05	7.08583e-05	4.09689e-05	6.59879e-05	7.63706e-05	6.96599e-05	5.62333e-05	6.07772e-05	6.83997e-05	6.57783e-05	5.96369e-05	6.47881e-05	6.23273e-05	5.93982e-05	5.41187e-05	6.83886e-05	5.54481e-05	7.05049e-05	7.04795e-05	7.66498e-05	7.66498e-05	7.66498e-05	6.8339e-05	6.37003e-05	7.40733e-05	1.82998e-05	6.01404e-05	6.06139e-05	6.73835e-05	7.08583e-05	1.94909e-05	6.59879e-05	2.7001e-05	1.00007	2.31906e-05	6.07772e-05	2.171e-05	6.57783e-05	5.96369e-05	6.47881e-05	6.23273e-05
41		Pumpkins	0.00120767	0.00106366	0.00108967	0.000627525	0.00101211	0.00114024	0.00121109	0.00120942	0.000886788	0.00107954	0.000958562	0.00110161	0.00108636	0.00100213	0.00119233	0.00111347	0.00106631	0.00111448	0.00101866	0.0010174	0.00104632	0.00121223	0.000945085	0.00123342	0.00123332	0.00125809	0.00125809	0.00125809	0.00120767	0.00106366	0.00108967	0.000404978	0.00101211	0.00114024	0.00121109	0.00120942	0.000421889	0.00107954	0.000338902	0.00110161	1.00045	0.00100213	0.000378445	0.00111347	0.00106631	0.00111448	0.00101866
42		Kales/sukuma wiki	0.00262673	0.00215053	0.0018449	0.00161118	0.00205266	0.00262054	0.00267532	0.00253752	0.00222238	0.00213685	0.00115859	0.00209721	0.00251562	0.00200187	0.00255865	0.00229807	0.00231344	0.0023447	0.00200727	0.00212662	0.00246287	0.00264712	0.00197741	0.00266139	0.00266203	0.00250708	0.00250708	0.00250708	0.00262673	0.00215053	0.0018449	0.00103979	0.00205266	0.00262054	0.00267532	0.00253752	0.00105729	0.00213685	0.000409621	0.00209721	0.00103744	1.002	0.000812112	0.00229807	0.00231344	0.0023447	0.00200727
43		Other food crops	0.410723	0.347206	0.329805	0.226361	0.329363	0.39613	0.414278	0.405066	0.3145	0.350184	0.253264	0.352206	0.373693	0.325866	0.403206	0.367776	0.357877	0.371806	0.328685	0.337811	0.367093	0.413259	0.315504	0.418614	0.418655	0.408631	0.408631	0.408631	0.410723	0.347206	0.329805	0.146084	0.329363	0.39613	0.414278	0.405066	0.149623	0.350184	0.089542	0.352206	0.154111	0.325866	1.12798	0.367776	0.357877	0.371806	0.328685
44		Amaranth	0.000800971	0.000692346	0.000692471	0.000415079	0.000655466	0.000757477	0.000803575	0.000799361	0.000578553	0.000702863	0.000586292	0.000716683	0.000710631	0.000653214	0.000790109	0.000729948	0.000697499	0.000733069	0.000661145	0.00066769	0.000697183	0.000805058	0.00062397	0.000819266	0.000819253	0.00082264	0.00082264	0.00082264	0.000800971	0.000692346	0.000692471	0.000267874	0.000655466	0.000757477	0.000803575	0.000799361	0.000275246	0.000702863	0.000207285	0.000716683	0.000293064	0.000653214	0.00025078	1.00073	0.000697499	0.000733069	0.000661145
45		Cowpeas	0.000858843	0.000706883	0.000591947	0.00055701	0.000680904	0.000870378	0.000878871	0.000823693	0.000773577	0.000696246	0.000359931	0.000675712	0.000856497	0.000654724	0.000834113	0.000753284	0.000773196	0.000768793	0.000657651	0.000698931	0.000822309	0.00086503	0.000643875	0.000866337	0.000866534	0.000818677	0.000818677	0.000818677	0.000858843	0.000706883	0.000591947	0.00035947	0.000680904	0.000870378	0.000878871	0.000823693	0.000368029	0.000696246	0.000127255	0.000675712	0.000353219	0.000654724	0.000264747	0.000753284	1.00077	0.000768793	0.000657651
46		African night shade	0.00130169	0.00108159	0.000952975	0.000795511	0.00103554	0.00129502	0.00132476	0.0012618	0.00110573	0.00107554	0.000639548	0.0010583	0.00125401	0.00100661	0.00126926	0.00114966	0.00115642	0.00116948	0.00101278	0.0010626	0.00121431	0.00131058	0.000984258	0.00131809	0.00131833	0.0012587	0.0012587	0.0012587	0.00130169	0.00108159	0.000952975	0.000513389	0.00103554	0.00129502	0.00132476	0.0012618	0.00052605	0.00107554	0.000226114	0.0010583	0.000517153	0.00100661	0.000402863	0.00114966	0.00115642	1.00117	0.00101278
47		Spiderplant	0.00101518	0.000826982	0.000687139	0.000649694	0.00079327	0.00102624	0.00103795	0.000973654	0.000898579	0.000816498	0.000399936	0.00079301	0.000997974	0.000766528	0.000985971	0.000883924	0.000903277	0.000904052	0.000768292	0.00082014	0.000968562	0.00102314	0.000759136	0.00102528	0.00102556	0.000957588	0.000957588	0.000957588	0.00101518	0.000826982	0.000687139	0.000419285	0.00079327	0.00102624	0.00103795	0.000973654	0.000427498	0.000816498	0.000141398	0.00079301	0.000411564	0.000766528	0.000312947	0.000883924	0.000903277	0.000904052	1.00077
48		Ethiopian Kale	0.000214257	0.000175	0.000147187	0.000134576	0.000167475	0.000215238	0.000218682	0.000206167	0.000185431	0.000173173	8.96428e-05	0.000169168	0.000208168	0.000162681	0.000208425	0.00018724	0.000189957	0.000191172	0.000163015	0.000173519	0.000202997	0.000215947	0.000160948	0.000216807	0.00021686	0.000204066	0.000204066	0.000204066	0.000214257	0.000175	0.000147187	8.68497e-05	0.000167475	0.000215238	0.000218682	0.000206167	8.82186e-05	0.000173173	3.16934e-05	0.000169168	8.58482e-05	0.000162681	6.6154e-05	0.00018724	0.000189957	0.000191172	0.000163015
49		Other ind. veg	0.000133379	0.000104709	8.09866e-05	8.58347e-05	9.9642e-05	0.000135639	0.000136589	0.000126912	0.000116776	0.000103241	3.64236e-05	9.95608e-05	0.000129054	9.70595e-05	0.00012922	0.000113365	0.000116034	0.000116853	9.64527e-05	0.000105494	0.000128579	0.000134724	9.86088e-05	0.00013489	0.000134946	0.000121512	0.000121512	0.000121512	0.000133379	0.000104709	8.09866e-05	5.5394e-05	9.9642e-05	0.000135639	0.000136589	0.000126912	5.55559e-05	0.000103241	1.28777e-05	9.95608e-05	5.32217e-05	9.70595e-05	4.10144e-05	0.000113365	0.000116034	0.000116853	9.64527e-05
50		Livestock (meat)	0.089075	0.0737032	0.067808	0.0492366	0.069568	0.0862176	0.0899276	0.0874496	0.067633	0.0743248	0.0484366	0.0745297	0.0801605	0.0691928	0.0873173	0.0786328	0.0765171	0.0798502	0.0694667	0.0723376	0.0801148	0.0897456	0.0679561	0.0908635	0.09088	0.0868619	0.0868619	0.0868619	0.089075	0.0737032	0.067808	0.0317752	0.069568	0.0862176	0.0899276	0.0874495	0.0321763	0.0743248	0.0171249	0.0745297	0.0330582	0.0691928	0.0277145	0.0786328	0.0765171	0.0798502	0.0694667
51		Livestock products (food)	0.052277	0.0435594	0.0398904	0.0298353	0.0413554	0.0509964	0.0528989	0.0511804	0.0412669	0.0437364	0.0285648	0.0436367	0.0482263	0.0407791	0.0511797	0.0463296	0.0455598	0.0470169	0.0410194	0.0426661	0.0474915	0.0526403	0.0398417	0.0531913	0.0531999	0.0511143	0.0511143	0.0511143	0.052277	0.0435594	0.0398904	0.0192544	0.0413554	0.0509964	0.0528989	0.0511804	0.0196327	0.0437364	0.0100992	0.0436367	0.0198885	0.0407791	0.0162444	0.0463296	0.0455598	0.0470169	0.0410194
52		Livestock products (dung)	0.0539626	0.0287961	0.0737215	0.040129	0.0263947	0.0196655	0.029007	0.0524564	0.0250384	0.0902886	0.0982739	0.0759938	0.127591	0.13463	0.0307076	0.101363	0.127445	0.0852436	0.128764	0.083392	0.105231	0.0361229	0.0204888	0.0190554	0.0190568	0.0187013	0.0187013	0.0187013	0.0539626	0.0287961	0.0737215	0.0258975	0.0263947	0.0196655	0.029007	0.0524564	0.011912	0.0902886	0.034745	0.0759938	0.0526184	0.13463	0.00974657	0.101363	0.127445	0.0852436	0.128764
53		Firewood	0.000428718	0.000371831	0.000363539	0.000239309	0.000355452	0.000413475	0.000432499	0.000424282	0.000337351	0.000374265	0.000298377	0.000376758	0.000399308	0.000348473	0.000421284	0.00039049	0.000381851	0.000392789	0.000353434	0.000358289	0.000382563	0.000430634	0.000331563	0.000436061	0.000436059	0.000436426	0.000436426	0.000436426	0.000428718	0.000371831	0.000363539	0.00015444	0.000355452	0.000413475	0.000432499	0.000424282	0.000160494	0.000374265	0.000105492	0.000376758	0.000164675	0.000348473	0.000133715	0.00039049	0.000381851	0.000392789	0.000353434
54		Coal	0.000248114	0.00022393	0.000244897	0.000115362	0.00021192	0.000227095	0.000246687	0.000252779	0.000164506	0.00022991	0.000233574	0.00023875	0.000212506	0.000212326	0.00024659	0.000232946	0.000216725	0.000231513	0.000216687	0.000211585	0.000205508	0.000248733	0.000197371	0.000254734	0.000254684	0.000266823	0.000266823	0.000266823	0.000248114	0.00022393	0.000244897	7.44498e-05	0.00021192	0.000227095	0.000246687	0.000252779	7.82636e-05	0.00022991	8.25805e-05	0.00023875	8.76376e-05	0.000212326	7.82676e-05	0.000232946	0.000216725	0.000231513	0.000216687
55		Oil and gas	0.0208644	0.0190787	0.0217082	0.00890306	0.0179755	0.018692	0.020622	0.0214946	0.0128008	0.0197503	0.0214838	0.0207241	0.0172026	0.0181564	0.0208226	0.0197666	0.0180252	0.0195728	0.0185719	0.0178846	0.0167294	0.0209014	0.0167477	0.0214943	0.021489	0.0227859	0.0227859	0.0227859	0.0208644	0.0190787	0.0217082	0.00574565	0.0179755	0.018692	0.020622	0.0214946	0.00608996	0.0197503	0.00759564	0.0207241	0.00709436	0.0181564	0.00660909	0.0197666	0.0180252	0.0195728	0.0185719
56		Processed food	0.176289	0.146666	0.136017	0.0974946	0.13864	0.170543	0.177953	0.173244	0.134365	0.147892	0.0989396	0.148368	0.159223	0.137654	0.172858	0.156165	0.152031	0.158415	0.138373	0.143615	0.158363	0.177553	0.134689	0.179766	0.179795	0.172704	0.172704	0.172704	0.176289	0.146666	0.136017	0.0629188	0.13864	0.170543	0.177953	0.173244	0.0639241	0.147892	0.0349803	0.148368	0.0656636	0.137654	0.0548651	0.156165	0.152031	0.158415	0.138373
57		Leisure goods	0.0199545	0.0177272	0.0187412	0.00979603	0.0168033	0.0185528	0.0199242	0.0201482	0.0138931	0.0181096	0.0170628	0.0186384	0.0174536	0.0167528	0.0197617	0.0185098	0.017458	0.0184783	0.0170546	0.016864	0.0169007	0.0200212	0.015719	0.0204352	0.0204328	0.0210181	0.0210181	0.0210181	0.0199545	0.0177272	0.0187412	0.00632194	0.0168033	0.0185528	0.0199242	0.0201482	0.00660963	0.0181096	0.00603259	0.0186384	0.00719785	0.0167528	0.00627236	0.0185098	0.017458	0.0184783	0.0170546
58		Necessities and utensils	0.146142	0.127072	0.129262	0.0745075	0.120297	0.137593	0.146417	0.146304	0.104592	0.129336	0.110881	0.132109	0.128939	0.119845	0.144273	0.133515	0.127114	0.133981	0.121516	0.121995	0.126116	0.146818	0.113984	0.149476	0.149473	0.150337	0.150337	0.150337	0.146142	0.127072	0.129262	0.048084	0.120297	0.137593	0.146417	0.146304	0.0497596	0.129336	0.0392021	0.132109	0.0531744	0.119845	0.0457923	0.133515	0.127114	0.133981	0.121516
59	Factors	peri-urban land (rented)	0.00241971	0.00948078	0.00187784	0.00233132	0.0106531	0.00225975	0.00232449	0.00306299	0.00177825	0.0042963	0.0339536	0.00828729	0.00212624	0.00878551	0.0038117	0.0116219	0.0109371	0.00810789	0.0101851	0.0102352	0.00235968	0.00237761	0.0019125	0.00234577	0.00234596	0.00230002	0.00230002	0.00230002	0.00241971	0.00948078	0.00187784	0.00150454	0.0106531	0.00225975	0.00232449	0.00306299	0.000845999	0.0042963	0.0120044	0.00828729	0.000876861	0.00878551	0.00120983	0.0116219	0.0109371	0.00810789	0.0101851
60		peri-urban land (owned)	0.0998922	0.28999	0.540158	0.0657601	0.316889	0.0801101	0.0880137	0.151261	0.186424	0.281796	0.825544	0.301046	0.133876	0.235887	0.117727	0.206553	0.208072	0.175127	0.288973	0.177269	0.0988004	0.0844829	0.0701414	0.0739922	0.073998	0.0725853	0.0725853	0.0725853	0.0998922	0.28999	0.540158	0.0424387	0.316889	0.0801101	0.0880137	0.151261	0.088691	0.281796	0.291873	0.301046	0.0552106	0.235887	0.0373665	0.206553	0.208072	0.175127	0.288973
61		rural land (rented)	0.00223114	0.00768128	0.00159817	0.0350996	0.00720103	0.0110103	0.00322105	0.00215379	0.00987074	0.00379684	0.00449103	0.00195738	0.00202825	0.0065647	0.0053037	0.00356945	0.0093031	0.00427135	0.00349841	0.0055309	0.0640318	0.00210076	0.00160722	0.00211567	0.00211598	0.00203852	0.00203852	0.00203852	0.00223114	0.00768128	0.00159817	0.0226518	0.00720103	0.0110103	0.00322105	0.00215379	0.004696	0.00379684	0.00158781	0.00195738	0.000836448	0.0065647	0.00168339	0.00356945	0.0093031	0.00427135	0.00349841
62		rural land (owned)	0.0766962	0.13758	0.0778361	0.273971	0.185219	0.173589	0.105081	0.0430569	0.434026	0.0896538	0.066711	0.0365857	0.324394	0.0935946	0.0618096	0.105288	0.215752	0.102293	0.114558	0.108155	0.209434	0.0700138	0.0320229	0.0420882	0.0420943	0.0406062	0.0406062	0.0406062	0.0766962	0.13758	0.0778361	0.176809	0.185219	0.173589	0.105081	0.0430569	0.206487	0.0896538	0.0235858	0.0365857	0.13378	0.0935946	0.0196183	0.105288	0.215752	0.102293	0.114558
63		family labour	0.170527	0.182447	0.251897	0.240921	0.19644	0.154028	0.194162	0.153832	0.160572	0.216255	0.32068	0.217532	0.510106	0.28485	0.163678	0.247924	0.283287	0.220274	0.23777	0.237776	0.263271	0.169509	0.376203	0.229717	0.225962	1.13845	1.13845	1.13845	0.170527	0.182447	0.251897	0.15548	0.19644	0.154028	0.194162	0.153832	0.0763922	0.216255	0.113377	0.217532	0.210368	0.28485	0.0519512	0.247924	0.283287	0.220274	0.23777
64		hired labour	0.0365817	0.0822947	0.107978	0.203665	0.100507	0.0703162	0.0408451	0.038519	0.189648	0.0663918	0.109857	0.0663008	0.0876968	0.067304	0.0417481	0.050151	0.060377	0.0511701	0.0630697	0.069009	0.0689811	0.0362035	0.0428461	0.028836	0.0288395	0.0280038	0.0280038	0.0280038	0.0365817	0.0822947	0.107978	0.131437	0.100507	0.0703162	0.0408451	0.038519	0.0902249	0.0663918	0.0388401	0.0663008	0.0361661	0.067304	0.0132508	0.050151	0.060377	0.0511701	0.0630697
65		Seeds	0.0186736	0.0798986	0.0146969	0.392455	0.0812742	0.0314934	0.0186323	0.0182277	0.0144364	0.0943585	0.138627	0.0516792	0.0187007	0.124519	0.0228218	0.0636442	0.113157	0.0725375	0.135836	0.153752	0.121815	0.0207799	0.0141528	0.0187724	0.0187743	0.0183029	0.0183029	0.0183029	0.0186736	0.0798986	0.0146969	0.253274	0.0812742	0.0314934	0.0186323	0.0182277	0.00686809	0.0943585	0.049012	0.0516792	0.00771215	0.124519	0.00724363	0.0636442	0.113157	0.0725375	0.135836
66		Fertilizer (bought)	0.0154601	0.0446382	0.03181	0.0495567	0.062071	0.0273335	0.0127412	0.0125935	0.146627	0.0213899	0.0453108	0.0240168	0.0357781	0.0295643	0.0182121	0.0228413	0.0220573	0.0214458	0.0263733	0.0224251	0.0217069	0.0134241	0.00911208	0.0118358	0.0118372	0.0115026	0.0115026	0.0115026	0.0154601	0.0446382	0.03181	0.0319817	0.062071	0.0273335	0.0127412	0.0125935	0.0697575	0.0213899	0.0160198	0.0240168	0.0147549	0.0295643	0.00578049	0.0228413	0.0220573	0.0214458	0.0263733
67		Pesticides	0.00147273	0.00343678	0.00123963	0.00182658	0.00284029	0.00209744	0.00151062	0.00142587	0.00160584	0.00937309	0.0224114	0.00837411	0.00467297	0.0159042	0.00367072	0.0068424	0.00978553	0.00804345	0.00993026	0.0084777	0.00714287	0.00322498	0.00110007	0.00145255	0.00145267	0.00142542	0.00142542	0.00142542	0.00147273	0.00343678	0.00123963	0.0011788	0.00284029	0.00209744	0.00151062	0.00142587	0.000763977	0.00937309	0.00792362	0.00837411	0.00192713	0.0159042	0.00116508	0.0068424	0.00978553	0.00804345	0.00993026
68		Machinery	0.00536821	0.020084	0.0227664	0.0284157	0.0289721	0.017354	0.0103236	0.00535673	0.00424069	0.00440891	0.0141575	0.00559978	0.0142962	0.0077149	0.00872506	0.00610958	0.00918332	0.00620385	0.00629274	0.00821191	0.0104601	0.00540366	0.00383261	0.00496389	0.00496451	0.00481374	0.00481374	0.00481374	0.00536821	0.020084	0.0227664	0.0183383	0.0289721	0.017354	0.0103236	0.00535673	0.0020175	0.00440891	0.00500543	0.00559978	0.00589573	0.0077149	0.00276933	0.00610958	0.00918332	0.00620385	0.00629274
69		Irrigation water	0.00150774	0.00121564	0.0018072	0.00154253	0.00129205	0.00120307	0.00122592	0.00133092	0.00094131	0.00804118	0.00669556	0.017261	0.0142689	0.0174561	0.00327933	0.0140065	0.00377587	0.00869073	0.0172085	0.0125784	0.00158884	0.00133451	0.000958877	0.0012373	0.00123738	0.00121819	0.00121819	0.00121819	0.00150774	0.00121564	0.0018072	0.000995485	0.00129205	0.00120307	0.00122592	0.00133092	0.000447827	0.00804118	0.00236723	0.017261	0.00588449	0.0174561	0.00104086	0.0140065	0.00377587	0.00869073	0.0172085
70		Livestock feed/vetinary/other costs	0.0913393	0.0733608	0.07842	0.0519471	0.0692061	0.0815787	0.0870712	0.0899086	0.0658054	0.0861716	0.0675231	0.0837998	0.0977843	0.0901424	0.0852755	0.0918884	0.0948603	0.0895976	0.0894203	0.0824885	0.0927583	0.088361	0.28164	0.0860859	0.0860968	0.0834618	0.0834618	0.0834618	0.0913393	0.0733608	0.07842	0.0335244	0.0692061	0.0815787	0.0870712	0.0899086	0.0313069	0.0861716	0.0238729	0.0837998	0.0403262	0.0901424	0.0270664	0.0918884	0.0948603	0.0895976	0.0894203
71		Agricultural profit	1.46542	0.919786	0.633249	0.348531	0.747437	1.31374	1.43476	1.44917	0.552224	0.97143	-0.0492915	1.02131	0.651381	0.825636	1.43553	1.06058	0.847601	1.13983	0.8147	0.960214	0.962579	1.49933	0.921016	1.50536	1.50923	0.569338	0.569338	0.569338	1.46542	0.919786	0.633249	0.224927	0.747437	1.31374	1.43476	1.44917	0.26272	0.97143	-0.0174271	1.02131	0.268629	0.825636	0.455635	1.06058	0.847601	1.13983	0.8147
72		Credits/capital	-0.258742	-0.19316	-0.111295	-0.201921	-0.187765	-0.281158	-0.270367	-0.235896	-0.274391	-0.183127	0.00827783	-0.165376	-0.280877	-0.17538	-0.246756	-0.212069	-0.234329	-0.22217	-0.172505	-0.200529	-0.273159	-0.261877	-0.184228	-0.258033	-0.258194	-0.218997	-0.218997	-0.218997	-0.258742	-0.19316	-0.111295	-0.130311	-0.187765	-0.281158	-0.270367	-0.235896	-0.130541	-0.183127	0.00292665	-0.165376	-0.115834	-0.17538	-0.0783203	-0.212069	-0.234329	-0.22217	-0.172505
73	Households	Food-insecure rural households	0.196826	0.161376	0.11734	0.154891	0.160195	0.212446	0.205305	0.182475	0.218694	0.15361	0.0487061	0.141227	0.224502	0.146218	0.188532	0.171045	0.189151	0.175895	0.147259	0.160644	0.2045	0.198067	0.143576	0.195086	0.195145	0.180641	0.180641	0.180641	0.196826	0.161376	0.11734	0.0999599	0.160195	0.212446	0.205305	0.182475	0.104043	0.15361	0.0172202	0.141227	0.0925844	0.146218	0.0598399	0.171045	0.189151	0.175895	0.147259
74		Food-secure rural households	0.668048	0.505018	0.374152	0.409689	0.472469	0.672728	0.681995	0.635773	0.544367	0.501708	0.128601	0.486518	0.612554	0.470728	0.647735	0.554943	0.557776	0.575679	0.463199	0.516399	0.63725	0.676424	0.49132	0.679344	0.679704	0.59205	0.59205	0.59205	0.668048	0.505018	0.374152	0.264395	0.472469	0.672728	0.681995	0.635773	0.258982	0.501708	0.0454673	0.486518	0.252617	0.470728	0.205591	0.554943	0.557776	0.575679	0.463199
75		Food-insecure peri-urban households	0.0530135	0.0547785	0.0728651	0.0151813	0.0516901	0.04282	0.0510956	0.0577217	0.0228172	0.0576309	0.0893593	0.0634359	0.0397538	0.0532508	0.0542159	0.0556321	0.0473656	0.0532021	0.0552745	0.0494992	0.0370023	0.0527504	0.0459787	0.0555083	0.0554537	0.0687391	0.0687391	0.0687391	0.0530135	0.0547785	0.0728651	0.00979738	0.0516901	0.04282	0.0510956	0.0577217	0.0108552	0.0576309	0.0315932	0.0634359	0.0163944	0.0532508	0.0172081	0.0556321	0.0473656	0.0532021	0.0552745
76		Food-secure peri-urban households	0.779759	0.736548	0.890838	0.293561	0.692733	0.676839	0.764255	0.817578	0.432242	0.76967	0.939246	0.819129	0.617331	0.704092	0.783366	0.755941	0.672394	0.74248	0.724251	0.679989	0.595517	0.779582	0.63691	0.806463	0.806148	0.88271	0.88271	0.88271	0.779759	0.736548	0.890838	0.189451	0.692733	0.676839	0.764255	0.817578	0.205639	0.76967	0.332073	0.819129	0.254587	0.704092	0.24864	0.755941	0.672394	0.74248	0.724251
			Banana	Beans	Coffee	Groundnuts	Maize	Sugarcane	Sweet potatoes	Napier grass	Tea	Cabbages	Irish potatoes	Spinach	Pumpkins	Kales/sukuma wiki	Other food crops	Amaranth	Cowpeas	African night shade	Spiderplant	Ethiopian kale	Mitoo	Other ind. veg	Livestock	Hunting, collecting, logging	Firewood + coal	Wage employment agr. sector	Wage emploment non-agr. sector	Own business activity	Banana	Beans	Coffee	Groundnuts	Maize	Sugarcane	Sweet potatoes	Napier grass	Tea	Cabbages	Irish potatoes	Spinach	Pumpkins	Kales/sukuma wiki	Other food crops	Amaranth	Cowpeas	African night shade	Spiderplant
			Activities																												Commodities
			1	2	3	4	5	6	7	8	9	10	11	12	13	14	15	16	17	18	19	20	21	22	23	24	25	26	27	28	29	30	31	32	33	34	35	36	37	38	39	40	41	42	43	44	45	46	47
	Multiplier	total production	2.11501	1.93948	1.90191	1.77817	1.89185	2.05131	2.09884	2.09459	1.84628	2.01704	1.75894	1.98708	2.10389	2.01543	2.07073	2.06649	2.09232	2.06504	2.01882	2.00601	2.10521	2.10364	2.00939	2.09688	2.09703	2.05952	2.05952	2.05952
		own sector	1.06399	1.05399	1.00388	1.01485	1.08199	1.01907	1.01583	1.0748	1.00708	1.00511	1.00703	1.00422	1.00212	1.00949	1.16873	1.01212	1.01101	1.02295	1.01356	1.00332	1.00109	1.01041	1.30561	1.0068	1.07561	1	1	1
		linkage production	1.05103	0.885487	0.898025	0.763314	0.809865	1.03223	1.083	1.01979	0.839205	1.01194	0.751915	0.982863	1.10177	1.00594	0.902002	1.05437	1.08132	1.04208	1.00525	1.00269	1.10412	1.09323	0.703786	1.09008	1.02142	1.05952	1.05952	1.05952
		induced income	1.69765	1.45772	1.4552	0.873321	1.37709	1.60483	1.70265	1.69355	1.21812	1.48262	1.20591	1.51031	1.49414	1.37429	1.67385	1.53756	1.46669	1.54726	1.38998	1.40653	1.47427	1.70682	1.31779	1.7364	1.73645	1.72414	1.72414	1.72414
[truncated: 33 more columns]
